# Supplementary material for: A 1 MDa protein complex containing critical components of the Escherichia coli divisome
Source: PubMed Central journal article supplement (PMC4672292; doi:10.1038/srep18190), 2015-12-08
Supplement: srep18190-s1.pdf [file srep18190-s1.pdf]

1 **Supplemental material for:**

2

3 **A 1 MDa protein complex containing critical components of the Escherichia coli**  
4 **divisome.**

5

6 **Erik N. Trip and Dirk-Jan Scheffers**

7

8 **contents:**

9 supplemental figures (S1-S5) with legends, supplemental tables (S1, S2), supplemental text,  
10 supplemental file S1.

11

12 **Figure S1**

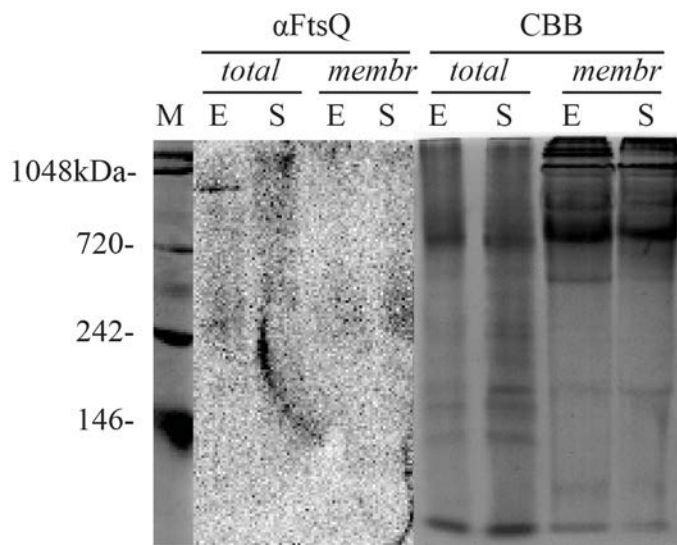

13

14 **Figure S1.** Native PAGE followed by Western blotting with antibodies against FtsQ of total  
15 cell fractions vs membrane fractions. On the far left side, a coomassie stained lane containing  
16 Native Mark<sup>TM</sup> unstained protein standard (novex). On the far right side, four coomassie  
17 stained lanes containing total cell fractions and membrane fractions sampled at mid-  
18 exponential growth phase (E) and early stationary growth phase (S). In the middle, an  
19 immunoblot probed with antibodies against FtsQ. Only in the total cell fraction sample taken  
20 during exponential growth the 1 MDa cell division complex is visible. In contrast to the total  
21 cell fraction sampled during stationary phase and in contrast to both membrane fractions  
22 where no bands were visible.

23

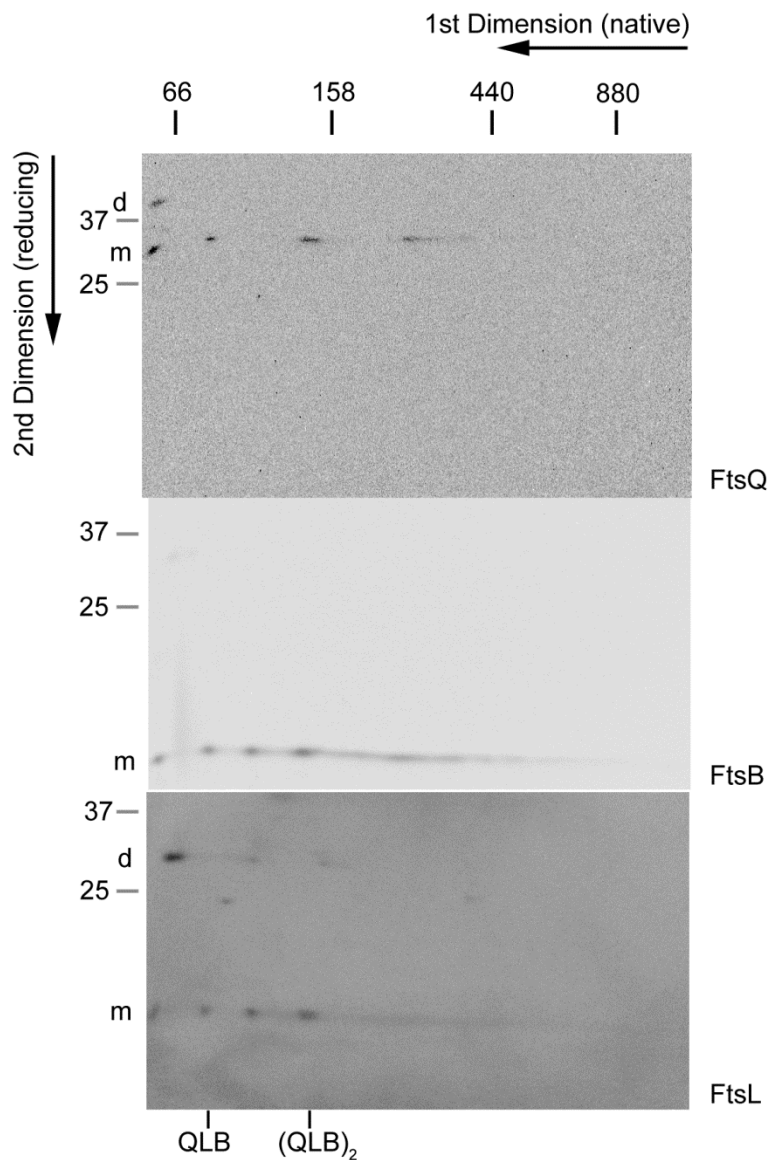

25

26 **Figure S2. Two-dimensional native/SDS-PAGE of *E. coli* inner membrane vesicles**

27 **(IMVs) shows complexes of FtsQ, FtsB and FtsL.** Immunoblots of two-dimensional Blue

28 Native/SDS PAGE gels reveal monomers (m) as well as dimers (d) that have not disintegrated

29 upon equilibration in SDS-buffer. Two distinct sets of spots of FtsQ/B/L running at the same

30 height in the 1<sup>st</sup> dimension can be resolved that could correspond to a FtsQLB complex (QLB)

31 and a dimer of this complex (QLB<sub>2</sub>). Additional spots corresponding to a potential complex

32 containing FtsB and FtsL are found between the two putative QLB complexes, as well as a

33 smeared signal at higher molecular weight, indicating a disintegrating high Mw complex.

34 Molecular weight markers are indicated on the sides of the blots. Two-dimensional  
35 Native/SDS-PAGE was performed as described in <sup>64</sup>. Briefly, *E. coli* MC4100 cytoplasmic  
36 membranes were resuspended in 750 mM Aminocaproic acid; 50 mM Bis-Tris/HCl pH 7.0,  
37 and solubilized with 0.5% dodecyl-maltoside. After removal of unsolubilized material, 0.5%  
38 Serva-Blue G was added to the samples. Samples (30 µg total protein per lane) were run on a  
39 5-14% gradient gel cast on a GelBond PAG backing (Cambrex). Blue Native electrophoresis  
40 was performed using a step gradient with constant cooling. Ferritin (440 and 880 kDa),  
41 aldolase (158 kDa), and albumin (66 kDa) (GE Healthcare) were used as molecular mass  
42 markers. Lanes were cut from the gel, equilibrated for 15 min in 2% SDS, 5 mM  
43 tributylphosphine and 15 min in 2% SDS, 260 mM iodoacetamide, and mounted on top of a  
44 1.5-mm-thick second dimension gel. Next to the lane, two pieces of filterpaper spotted with  
45 IMVs solubilized in SDS-sample buffer or with a prestained molecular weight marker,  
46 respectively, were loaded onto the gel. Samples were separated in the second dimension on  
47 10% Duracryl (Genomic Solutions) gels using a Tricine-SDS buffer system in an Ettan  
48 DALTwelve system (GE Healthcare) with constant cooling. Proteins were transferred from  
49 the gels onto PVDF sheets in wet-blot systems (BioRad TransBlot, 15V, O/N, 4°C).  
50 Immunodetection was done as described in the text.

51

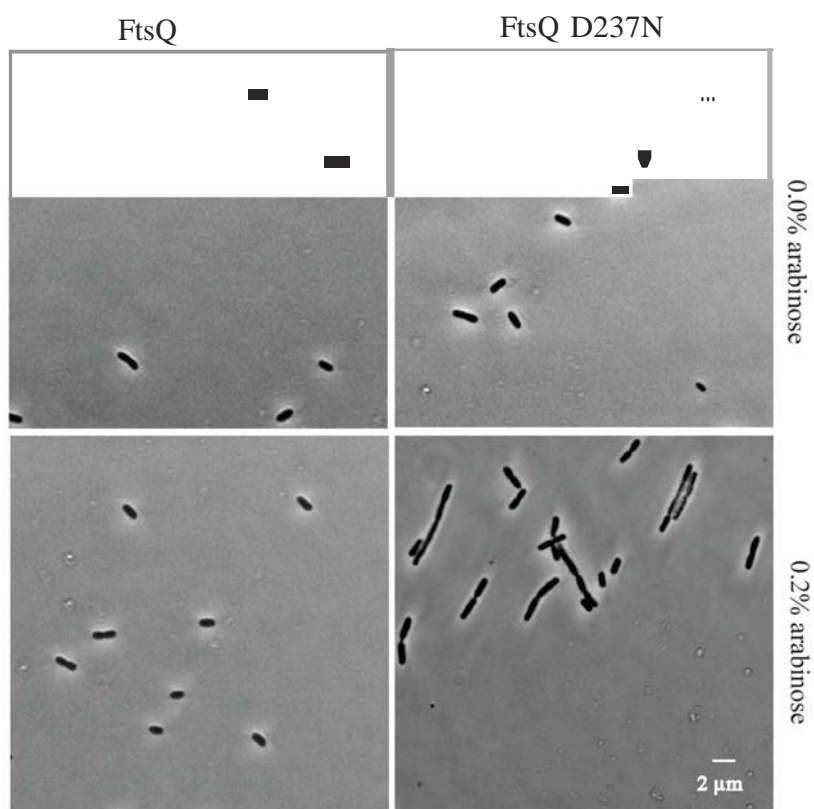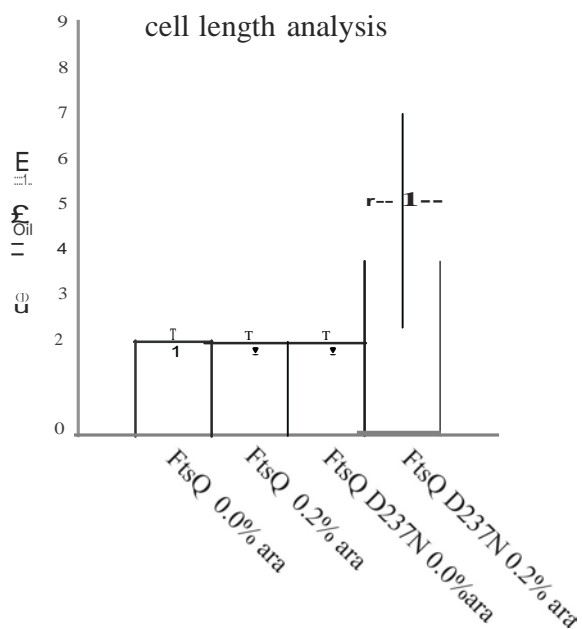

54 **Figure S3. Cell-length analysis of cells expressing mutant FtsQ D237N.** (A). Phase  
55 contrast microscopy images of the cells expressing additional FtsQ or FtsQ D237N. An  
56 aliquot of cells was fixed simultaneous to sample preparation for Native Page. (B). Cell length  
57 analysis of the cells depicted in (A). Microscopy images were analyzed with the ObjectJ  
58 plugin for Fiji (ImageJ). Average lengths and standard deviations were: MC4100 pBAD-*ftsQ*  
59 - 0% arabinose:  $2.00 \pm 0.28 \mu\text{m}$  (n=173); 0.2% arabinose:  $1.98 \pm 0.23 \mu\text{m}$  (n=176). MC4100  
60 pBAD-*ftsQD237N* - 0% arabinose:  $1.98 \pm 0.24 \mu\text{m}$  (n=135); 0.2% arabinose:  $5.09 \pm 2.75 \mu\text{m}$   
61 (n=187).

62

63 **Fig. S4**

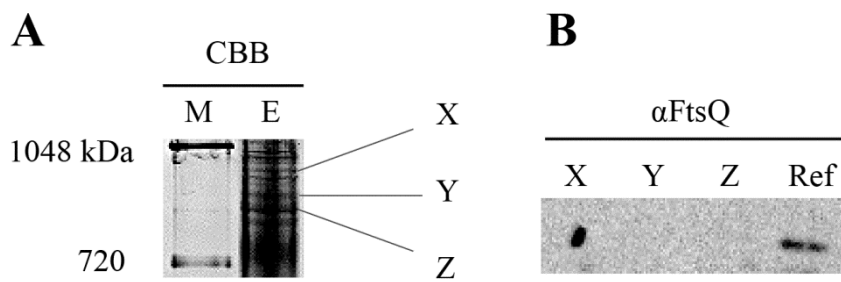

64

65 **Figure S4. Pinpointing the 1 MDa band of interest in a coomassie stained native gel.**

66 **A:** Boxed region of the coomassie stained native gel in the region ranging from 1048 to 720

67 kDa. (M) is the lane containing the Native Mark<sup>TM</sup> unstained protein standard (novex), (E) is

68 the lane containing the exponential phase sample; X, Y and Z are the bands in this lane that

69 potentially could be the 1 MDa band of interest. **B:** these bands were excised from the

70 coomassie stained native gel and subjected to SDS-Page and Western blotting and probed

71 with antibodies against FtsQ as described above. (Ref) is a conventional whole cell SDS-Page

72 sample for reference purposes. Band X was found to be the 1 MDa band of interest in the

73 coomassie stained native gel. Subsequently, this band X from the exponential phase sample

74 lane as well as a corresponding band from the stationary phase sample lane (control) were

75 excised for further analysis.

76

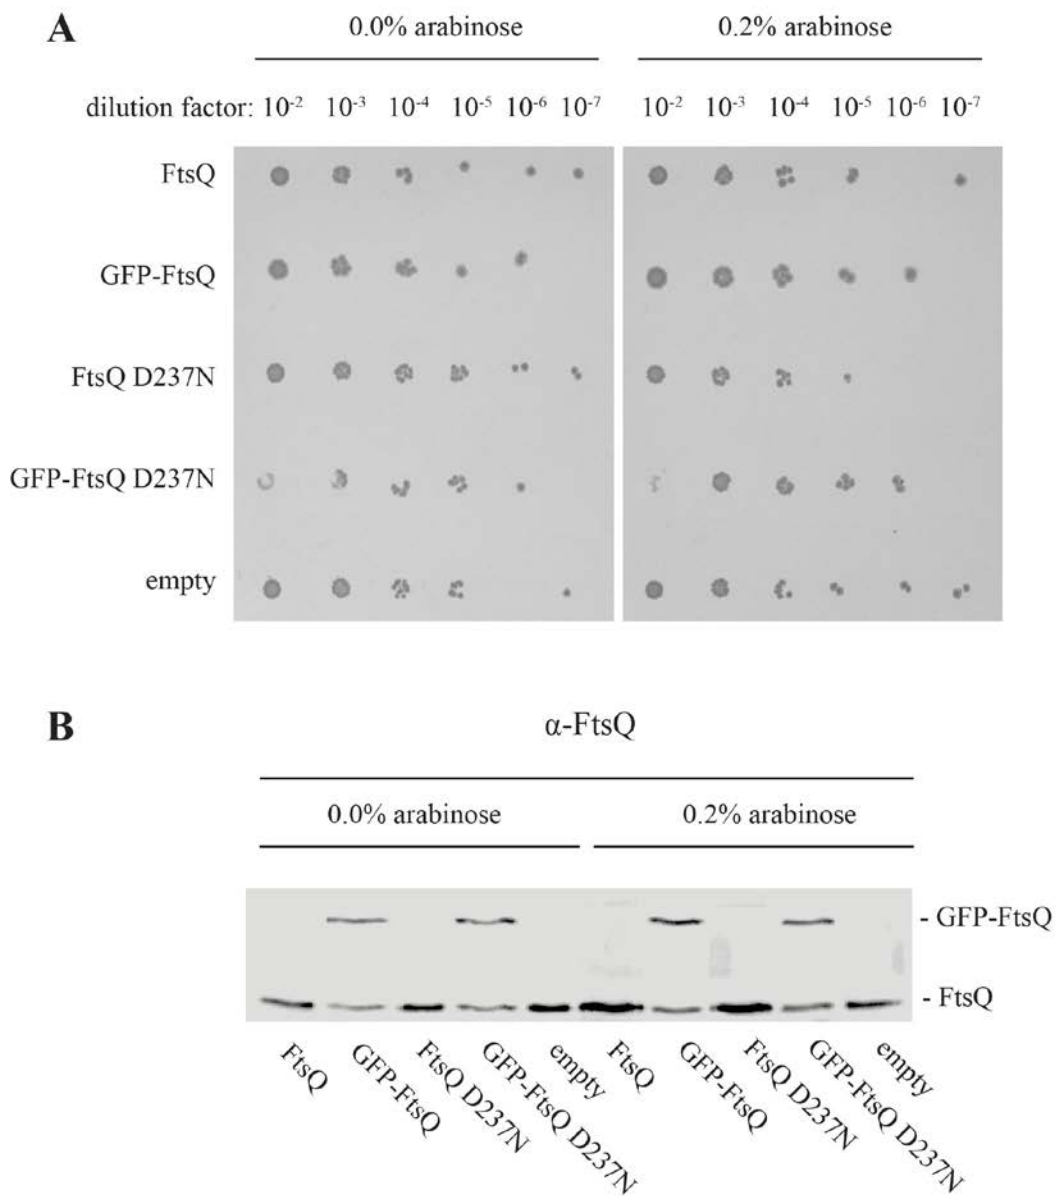

78

79 **Figure S5. Influence of GFP-tags to FtsQ on cell growth.** (A.) Dilution series of cells  
 80 expressing additional FtsQ, GFP-FtsQ, FtsQ D237N and GFP-FtsQ D237N spotted on LB  
 81 agar plates. (B.) Protein expression control. The presence of FtsQ and GFP-FtsQ was  
 82 monitored in the cell samples from panel A.

83



84 **Table S1. Proteins identified by Mass spectroscopy in the Native gel fragment of interest**  
 85 **excized from exponential phase lane**

| Protein name                             | Protein accession numbers | Protein molecular weight (Da) | Protein identification probability | Exclusive unique peptide count | Exclusive unique spectrum count | Total spectrum count | Percentage of total spectra | Percentage sequence coverage |
|------------------------------------------|---------------------------|-------------------------------|------------------------------------|--------------------------------|---------------------------------|----------------------|-----------------------------|------------------------------|
| Serine transporter.                      | sp P0AAD6 SDAC_ECOLI      | 46.909,00                     | 100,00%                            | 3                              | 5                               | 7                    | 0,13%                       | 7,69%                        |
| Inosine-5'-monophosphate dehydrogenase ( | sp P0ADG7 IMDH_ECOLI      | 52.022,20                     | 100,00%                            | 8                              | 9                               | 9                    | 0,17%                       | 23,60%                       |
| Maltose/maltodextrin import ATP-binding  | sp P68187 MALK_ECOLI      | 40.989,90                     | 100,00%                            | 5                              | 5                               | 5                    | 0,09%                       | 13,70%                       |
| Chaperone protein dnaK (Heat shock prote | sp P0A6Y8 DNAK_ECOLI      | 68.984,90                     | 100,00%                            | 23                             | 30                              | 47                   | 0,88%                       | 39,40%                       |
| Mannose permease IID component (PTS syst | sp P69805 PTND_ECOLI      | 31.304,00                     | 100,00%                            | 5                              | 6                               | 7                    | 0,13%                       | 21,00%                       |
| Hypothetical protein yqjD.               | sp P64581 YQJD_ECOLI      | 11.051,70                     | 96,10%                             | 1                              | 1                               | 1                    | 0,02%                       | 15,80%                       |
| D-ribose-binding periplasmic protein pre | sp P02925 RBSB_ECOLI      | 30.950,50                     | 100,00%                            | 11                             | 12                              | 14                   | 0,26%                       | 50,30%                       |
| Dihydrolipoyl dehydrogenase (EC 1.8.1.4) | sp P0A9P0 DLDH_ECOLI      | 50.557,70                     | 100,00%                            | 9                              | 11                              | 12                   | 0,22%                       | 23,70%                       |
| Rod shape-determining protein mreC.      | sp P16926 MREC_ECOLI      | 39.530,60                     | 100,00%                            | 3                              | 3                               | 3                    | 0,06%                       | 13,10%                       |
| Iron(III) dicitrate transport protein fe | sp P13036 FECA_ECOLI      | 85.323,80                     | 100,00%                            | 7                              | 7                               | 8                    | 0,15%                       | 11,80%                       |
| Hypothetical protein yggE.               | sp P0ADS6 YGGE_ECOLI      | 26.635,50                     | 100,00%                            | 2                              | 2                               | 2                    | 0,04%                       | 6,91%                        |
| PTS system maltose- and glucose-specific | sp P19642 PTOCB_ECOLI     | 56.628,40                     | 100,00%                            | 2                              | 2                               | 2                    | 0,04%                       | 4,15%                        |
| Thiamine biosynthesis protein thil.      | sp P77718 THII_ECOLI      | 54.973,70                     | 100,00%                            | 3                              | 3                               | 3                    | 0,06%                       | 6,43%                        |
| NADH-quinone oxidoreductase chain G (EC  | sp P33602 NUOG_ECOLI      | 100.168,30                    | 100,00%                            | 2                              | 2                               | 2                    | 0,04%                       | 2,43%                        |
| Glutamate synthase [NADPH] large chain p | sp P09831 GLTB_ECOLI      | 166.713,70                    | 100,00%                            | 8                              | 8                               | 8                    | 0,15%                       | 6,33%                        |
| UPF0234 protein yajQ.                    | sp P0A8E7 YAJQ_ECOLI      | 19.047,00                     | 100,00%                            | 4                              | 5                               | 5                    | 0,09%                       | 31,40%                       |
| Hypothetical UPF0135 protein ybgl.       | sp P0AFP6 YBGI_ECOLI      | 26.892,70                     | 96,10%                             | 1                              | 1                               | 1                    | 0,02%                       | 6,88%                        |
| Protein dcrB precursor.                  | sp P0AEE1 DCRB_ECOLI      | 19.787,70                     | 100,00%                            | 3                              | 4                               | 4                    | 0,07%                       | 22,70%                       |
| Dihydrolipoyllysine-residue acetyltransf | sp P06959 ODP2_ECOLI      | 65.964,70                     | 99,80%                             | 1                              | 1                               | 1                    | 0,02%                       | 2,23%                        |
| Hypothetical protein yefG (GalF transfer | sp P37749 YFEG_ECOLI      | 37.759,10                     | 100,00%                            | 2                              | 2                               | 2                    | 0,04%                       | 6,36%                        |
| Probable ornithine aminotransferase (EC  | sp P42588 OAT_ECOLI       | 46.401,60                     | 95,20%                             | 1                              | 1                               | 1                    | 0,02%                       | 2,80%                        |
| Succinyl-CoA synthetase beta chain (EC 6 | sp P0A836 SUCC_ECOLI      | 41.392,70                     | 100,00%                            | 4                              | 5                               | 5                    | 0,09%                       | 14,70%                       |
| DNA-directed RNA polymerase beta' chain  | sp P0A8T7 RPOC_ECOLI      | 155.164,10                    | 100,00%                            | 6                              | 6                               | 7                    | 0,13%                       | 5,83%                        |
| 50S ribosomal protein L22.               | sp P61175 RL22_ECOLI      | 12.226,60                     | 96,10%                             | 1                              | 1                               | 1                    | 0,02%                       | 11,80%                       |
| Hypothetical protein yhaM.               | sp P42626 YHAM_ECOLI      | 45.361,20                     | 96,10%                             | 1                              | 1                               | 1                    | 0,02%                       | 2,52%                        |
| Serine hydroxymethyltransferase (EC 2.1. | sp P0A825 GLYA_ECOLI      | 45.316,70                     | 100,00%                            | 2                              | 2                               | 2                    | 0,04%                       | 4,56%                        |
| DNA-directed RNA polymerase beta chain ( | sp P0A8V2 RPOB_ECOLI      | 150.635,90                    | 100,00%                            | 27                             | 34                              | 43                   | 0,80%                       | 23,40%                       |

|                                          |                       |           |         |    |    |    |       |        |
|------------------------------------------|-----------------------|-----------|---------|----|----|----|-------|--------|
| Pyroline-5-carboxylate reductase (EC 1.  | sp P0A9L8 PROC_ECOLI  | 28.145,00 | 100,00% | 7  | 11 | 21 | 0,39% | 34,90% |
| Inner membrane protein yjiY.             | sp P39396 YJIY_ECOLI  | 77.860,40 | 100,00% | 2  | 2  | 2  | 0,04% | 3,74%  |
| keratin 1, type II, cytoskeletal - human | KRHU2                 | 65.495,20 | 100,00% | 3  | 3  | 3  | 0,06% | 5,29%  |
| Tripeptide permease tppB.                | sp P77304 TPPB_ECOLI  | 53.993,30 | 97,80%  | 1  | 1  | 1  | 0,02% | 2,60%  |
| Maltoporin precursor (Maltose-inducible  | sp P02943 LAMB_ECOLI  | 49.912,80 | 100,00% | 4  | 4  | 4  | 0,07% | 13,00% |
| Elongation factor Ts (EF-Ts).            | sp P0A6P1 EFTS_ECOLI  | 30.291,60 | 100,00% | 12 | 15 | 16 | 0,30% | 40,80% |
| Phosphate-binding periplasmic protein pr | sp P0AG82 PSTS_ECOLI  | 37.024,70 | 100,00% | 11 | 11 | 16 | 0,30% | 41,00% |
| Heat shock protein hslJ.                 | sp P52644 HSLJ_ECOLI  | 15.166,00 | 100,00% | 2  | 2  | 2  | 0,04% | 19,30% |
| ATP synthase gamma chain (EC 3.6.3.14) ( | sp P0ABA6 ATPG_ECOLI  | 31.577,90 | 100,00% | 5  | 5  | 5  | 0,09% | 15,70% |
| Lipoprotein 34 precursor.                | sp P0A903 NLPB_ECOLI  | 36.842,30 | 100,00% | 9  | 10 | 13 | 0,24% | 35,20% |
| Protease VII precursor (EC 3.4.23.-) (Om | sp P09169 OMPT_ECOLI  | 35.563,90 | 100,00% | 10 | 12 | 20 | 0,37% | 34,40% |
| Cytochrome o ubiquinol oxidase subunit I | sp P0ABJ3 CYOC_ECOLI  | 22.623,20 | 96,10%  | 1  | 1  | 1  | 0,02% | 5,39%  |
| 2,3,4,5-tetrahydropyridine-2,6-dicarboxy | sp P0A9D8 DAPD_ECOLI  | 29.891,60 | 100,00% | 3  | 3  | 3  | 0,06% | 13,10% |
| Hypothetical protein yjel precursor.     | sp P0AF70 YJEL_ECOLI  | 11.958,30 | 99,90%  | 1  | 1  | 1  | 0,02% | 16,20% |
| UPF0283 membrane protein ycjF.           | sp P0A8R7 YCFJ_ECOLI  | 39.392,90 | 99,90%  | 1  | 1  | 1  | 0,02% | 3,68%  |
| Cell division proteinftsZ.               | sp P0A9A6 FTSZ_ECOLI  | 40.324,00 | 100,00% | 3  | 3  | 3  | 0,06% | 9,14%  |
| Tagatose-1,6-bisphosphate aldolase gatY  | sp P37192 GATY_ECOLI  | 30.811,50 | 100,00% | 3  | 3  | 3  | 0,06% | 9,86%  |
| GTP-binding protein lepA.                | sp P60785 LEPA_ECOLI  | 66.571,70 | 99,60%  | 1  | 1  | 1  | 0,02% | 1,84%  |
| Probable ABC transporter ATP-binding pro | sp P0A9V1 YHBG_ECOLI  | 26.670,30 | 100,00% | 4  | 5  | 7  | 0,13% | 19,60% |
| Purine nucleoside phosphorylase deoD-tyt | sp P0ABP8 DEOD_ECOLI  | 25.819,30 | 100,00% | 2  | 2  | 2  | 0,04% | 9,66%  |
| Isoaspartyl dipeptidase (EC 3.4.19.-).   | sp P39377 IADA_ECOLI  | 41.084,40 | 100,00% | 4  | 4  | 5  | 0,09% | 11,50% |
| Thymidine phosphorylase (EC 2.4.2.4) (Td | sp P07650 TYPH_ECOLI  | 47.208,30 | 98,20%  | 1  | 1  | 1  | 0,02% | 1,59%  |
| DNA-directed RNA polymerase alpha chain  | sp P0A7Z4 RPOA_ECOLI  | 36.512,10 | 100,00% | 5  | 6  | 6  | 0,11% | 16,70% |
| Galactoside transport system permease pr | sp P23200 MGLC_ECOLI  | 35.551,90 | 96,10%  | 1  | 1  | 1  | 0,02% | 3,87%  |
| Signal peptidase I (EC 3.4.21.89) (SPase | sp P00803 LEP_ECOLI   | 35.961,20 | 100,00% | 2  | 2  | 2  | 0,04% | 7,41%  |
| Pyruvate kinase II (EC 2.7.1.40) (PK-2). | sp P21599 KPYK2_ECOLI | 51.226,60 | 100,00% | 8  | 9  | 9  | 0,17% | 19,00% |
| Putative xanthine dehydrogenase yagR, mo | sp P77489 YAGR_ECOLI  | 78.089,00 | 99,40%  | 1  | 1  | 1  | 0,02% | 1,23%  |
| ATP synthase C chain (EC 3.6.3.14) (Lipi | sp P68699 ATPL_ECOLI  | 8.256,70  | 99,70%  | 2  | 2  | 6  | 0,11% | 20,30% |
| Phosphoenolpyruvate carboxylase (EC 4.1. | sp P00864 CAPP_ECOLI  | 99.066,00 | 100,00% | 18 | 18 | 22 | 0,41% | 21,20% |
| Biotin carboxylase (EC 6.3.4.14) (A subu | sp P24182 ACCC_ECOLI  | 49.321,90 | 100,00% | 9  | 9  | 13 | 0,24% | 20,50% |
| 10 kDa chaperonin (Protein Cpn10) (groES | sp P0A6F9 CH10_ECOLI  | 10.387,00 | 100,00% | 4  | 5  | 5  | 0,09% | 52,60% |
| Hypothetical adenine-specific methylase  | sp P39199 YFCB_ECOLI  | 35.002,40 | 100,00% | 4  | 4  | 4  | 0,07% | 13,20% |

|                                                                                          |                                                                    |           |         |    |    |    |       |        |
|------------------------------------------------------------------------------------------|--------------------------------------------------------------------|-----------|---------|----|----|----|-------|--------|
| 30S ribosomal protein S20.                                                               | sp P0A7U7 RS20_ECOLI                                               | 9.553,70  | 100,00% | 2  | 2  | 2  | 0,04% | 23,30% |
| 30S ribosomal protein S3.                                                                | sp P0A7V3 RS3_ECOLI                                                | 25.852,30 | 100,00% | 3  | 3  | 3  | 0,06% | 13,40% |
| Tryptophanase (EC 4.1.99.1) (L-tryptophan)                                               | sp P0A853 TNAE_ECOLI                                               | 52.774,80 | 100,00% | 17 | 23 | 43 | 0,80% | 42,70% |
| Aspartyl-tRNA synthetase (EC 6.1.1.12) (Asp)                                             | sp P21889 SYD_ECOLI                                                | 65.915,50 | 100,00% | 6  | 6  | 6  | 0,11% | 11,20% |
| Formate acetyltransferase 1 (EC 2.3.1.54)                                                | sp P09373 PFLB_ECOLI                                               | 85.229,10 | 100,00% | 20 | 34 | 44 | 0,82% | 30,60% |
| Hypothetical lipoprotein yedD precursor.                                                 | sp P31063 YEDD_ECOLI                                               | 14.983,50 | 100,00% | 4  | 5  | 6  | 0,11% | 41,60% |
| CTP synthase (EC 6.3.4.2) (UTP→ammonia)                                                  | sp P0A7E5 PYRG_ECOLI                                               | 60.243,40 | 100,00% | 5  | 5  | 5  | 0,09% | 10,70% |
| 50S ribosomal protein L5.                                                                | sp P62399 RL5_ECOLI                                                | 20.171,50 | 100,00% | 11 | 16 | 25 | 0,47% | 65,70% |
| 50S ribosomal protein L6.                                                                | sp P0AG55 RL6_ECOLI                                                | 18.772,30 | 100,00% | 2  | 2  | 2  | 0,04% | 13,10% |
| Phenylalanyl-tRNA synthetase alpha chain                                                 | sp P08312 SYFA_ECOLI                                               | 36.832,50 | 100,00% | 20 | 38 | 72 | 1,34% | 53,80% |
| Protein hflK.                                                                            | sp P0ABC7 HFLK_ECOLI                                               | 45.545,50 | 100,00% | 5  | 5  | 6  | 0,11% | 14,80% |
| ATP-dependent hsl protease ATP-binding subunit                                           | sp P0A6H5 HSLU_ECOLI                                               | 49.595,20 | 100,00% | 13 | 14 | 16 | 0,30% | 31,40% |
| NADH-quinone oxidoreductase chain B (EC 1.1.1.13)                                        | sp P0AFC7 NUOB_ECOLI                                               | 25.055,60 | 100,00% | 2  | 2  | 2  | 0,04% | 9,55%  |
| Ferrienterobactin receptor precursor (Eno)                                               | sp P05825 FEPA_ECOLI                                               | 82.108,40 | 100,00% | 4  | 4  | 4  | 0,07% | 8,98%  |
| Putative metalloprotease yggG (EC 3.4.24)                                                | sp P25894 YGGG_ECOLI                                               | 26.842,40 | 100,00% | 2  | 2  | 2  | 0,04% | 10,70% |
| Glyceraldehyde-3-phosphate dehydrogenase                                                 | sp P0A9B2 G3P1_ECOLI                                               | 35.401,40 | 100,00% | 15 | 20 | 33 | 0,62% | 43,90% |
| Sulfate/thiosulfate import ATP-binding protein                                           | sp P16676 CYSA_ECOLI                                               | 41.058,90 | 99,90%  | 1  | 1  | 1  | 0,02% | 3,01%  |
| Biopolymer transport exbB protein.                                                       | sp P0ABU7 EXBB_ECOLI                                               | 26.287,80 | 100,00% | 2  | 2  | 3  | 0,06% | 9,84%  |
| Protein-export membrane protein secF.                                                    | sp P0AG93 SECF_ECOLI                                               | 35.383,50 | 100,00% | 2  | 2  | 2  | 0,04% | 9,91%  |
| Lipid A export ATP-binding/permease protein                                              | sp P60752 MSBA_ECOLI                                               | 64.462,70 | 100,00% | 12 | 13 | 17 | 0,32% | 20,30% |
| Enoyl-[acyl-carrier-protein] reductase [NADPH-dependent]                                 | sp P0AEK4 FABI_ECOLI                                               | 27.733,40 | 96,10%  | 1  | 1  | 1  | 0,02% | 3,83%  |
| Acyl-CoA thioester hydrolase ybgC precursor                                              | sp P46130 YBHC_ECOLI                                               | 46.081,90 | 100,00% | 7  | 7  | 10 | 0,19% | 21,80% |
| Chaperone protein htpG (Heat shock protein 70)                                           | sp P0A6Z3 HTPG_ECOLI                                               | 71.425,00 | 100,00% | 16 | 17 | 22 | 0,41% | 29,30% |
| Glycogen phosphorylase (EC 2.4.1.1).                                                     | sp P0AC86 PHSG_ECOLI                                               | 93.175,30 | 99,60%  | 2  | 2  | 2  | 0,04% | 2,21%  |
| Alkyl hydroperoxide reductase subunit C                                                  | sp P0AE08 AHPC_ECOLI                                               | 20.630,70 | 100,00% | 2  | 2  | 2  | 0,04% | 15,60% |
| Colicin I receptor precursor.                                                            | sp P17315 CIRA_ECOLI                                               | 73.896,60 | 100,00% | 11 | 11 | 12 | 0,22% | 23,70% |
| Alkyl hydroperoxide reductase subunit F                                                  | sp P35340 AHPF_ECOLI                                               | 56.178,20 | 100,00% | 11 | 11 | 12 | 0,22% | 26,10% |
| ATP synthase beta chain (EC 3.6.3.14).                                                   | sp P0ABB4 ATPB_ECOLI                                               | 50.194,30 | 100,00% | 19 | 29 | 52 | 0,97% | 54,50% |
| Putative 6-hydroxy-D-nicotine oxidase OS=Arthrobacter nicotinovorans GN=6-HDNO PE=1 SV=1 | tr Q8GAG1 Q8GAG1_ARTNI,tr Q8GAGL L138H_ARTNI,tr Q8GAGM H130C_ARTNI | 49.922,80 | 98,80%  | 1  | 1  | 1  | 0,02% | 2,57%  |
| Glycerol-3-phosphate transporter (G-3-P)                                                 | sp P08194 GLPT_ECOLI                                               | 50.312,50 | 99,60%  | 1  | 1  | 1  | 0,02% | 2,43%  |

|                                           |                                                    |            |         |    |    |    |       |        |
|-------------------------------------------|----------------------------------------------------|------------|---------|----|----|----|-------|--------|
| Chain length determinant protein (Polysa  | sp P76372 WZZB_ECOLI                               | 36.455,60  | 100,00% | 8  | 9  | 11 | 0,21% | 32,20% |
| PTS system N-acetylglucosamine-specific   | sp P09323 PTW3C_ECOLI                              | 68.348,70  | 100,00% | 2  | 2  | 2  | 0,04% | 4,94%  |
| Hypothetical protein yrbK.                | sp P0ADV9 YRBK_ECOLI                               | 21.702,70  | 100,00% | 2  | 2  | 2  | 0,04% | 13,60% |
| Probable protease htpX (EC 3.4.24.-) (He  | sp P23894 HTPX_ECOLI                               | 31.924,10  | 96,10%  | 1  | 1  | 1  | 0,02% | 3,75%  |
| 50S ribosomal protein L18.                | sp P0C018 RL18_ECOLI                               | 12.769,70  | 100,00% | 3  | 4  | 5  | 0,09% | 22,20% |
| Transketolase 1 (EC 2.2.1.1) (TK 1).      | sp P27302 TKT1_ECOLI                               | 72.213,00  | 100,00% | 6  | 6  | 6  | 0,11% | 9,80%  |
| Penicillin-binding protein 5 precursor (  | sp P0AEB2 DACA_ECOLI                               | 44.445,50  | 96,10%  | 1  | 1  | 1  | 0,02% | 2,48%  |
| 5-methyltetrahydropteroyltriglutamate-h   | sp P25665 METE_ECOLI                               | 84.544,00  | 100,00% | 12 | 13 | 16 | 0,30% | 18,60% |
| Outer membrane lipoprotein slyB precursor | sp P0A905 SLYB_ECOLI                               | 15.600,60  | 100,00% | 4  | 8  | 12 | 0,22% | 38,70% |
| Formate dehydrogenase-O, major subunit (  | sp P32176 FDOG_ECOLI                               | 112.505,50 | 99,90%  | 1  | 1  | 1  | 0,02% | 1,67%  |
| 50S ribosomal protein L17.                | sp P0AG44 RL17_ECOLI                               | 14.365,20  | 100,00% | 3  | 4  | 7  | 0,13% | 26,00% |
| Pyruvate dehydrogenase E1 component (EC   | sp P0AFG8 ODP1_ECOLI                               | 99.540,00  | 100,00% | 32 | 42 | 62 | 1,16% | 39,20% |
| Rare lipoprotein A precursor.             | sp P10100 RLPA_ECOLI                               | 37.527,60  | 100,00% | 5  | 5  | 6  | 0,11% | 16,00% |
| Cystathionine gamma-synthase (EC 2.5.1.4  | sp P00935 METB_ECOLI                               | 41.550,90  | 100,00% | 3  | 3  | 4  | 0,07% | 9,59%  |
| Magnesium transporting ATPase, P-type 1   | sp P0ABB8 ATMA_ECOLI                               | 99.468,80  | 100,00% | 6  | 6  | 6  | 0,11% | 8,02%  |
| Glycyl-tRNA synthetase beta chain (EC 6.  | sp P00961 SYGB_ECOLI                               | 76.684,10  | 100,00% | 17 | 19 | 25 | 0,47% | 30,80% |
| Transcription elongation protein nusA (N  | sp P0AFF6 NUSA_ECOLI                               | 54.871,40  | 100,00% | 4  | 4  | 4  | 0,07% | 9,09%  |
| 2-amino-3-ketobutyrate coenzyme A ligase  | sp P0AB77 KBL_ECOLI                                | 43.117,70  | 100,00% | 2  | 2  | 2  | 0,04% | 5,03%  |
| D-methionine transport ATP-binding prote  | sp P30750 METN_ECOLI                               | 37.788,80  | 100,00% | 5  | 5  | 6  | 0,11% | 21,00% |
| Isoleucyl-tRNA synthetase (EC 6.1.1.5) (  | sp P00956 SYI_ECOLI                                | 104.167,10 | 100,00% | 4  | 4  | 4  | 0,07% | 4,27%  |
| Lipoprotein yfgL precursor.               | sp P77774 YFGL_ECOLI                               | 41.886,90  | 100,00% | 6  | 6  | 7  | 0,13% | 22,70% |
| PhoH-like protein.                        | sp P0A9K3 PHOL_ECOLI                               | 40.655,80  | 100,00% | 6  | 7  | 10 | 0,19% | 20,10% |
| Inner membrane protein yjgQ.              | sp P0ADC6 YJGQ_ECOLI                               | 39.620,10  | 100,00% | 2  | 2  | 3  | 0,06% | 6,39%  |
| Inner membrane protein oxaA.              | sp P25714 OXAA_ECOLI                               | 61.528,00  | 100,00% | 7  | 7  | 7  | 0,13% | 13,10% |
| Ellmtl                                    | 6H-C384S-W42,6H-W42,EII-F97W,sp P00550 PTM3C_ECOLI | 67.857,70  | 100,00% | 6  | 7  | 9  | 0,17% | 13,00% |
| 30S ribosomal protein S1.                 | sp P0AG67 RS1_ECOLI                                | 61.157,40  | 100,00% | 9  | 11 | 13 | 0,24% | 23,00% |
| Na(+)/H(+) antiporter 2 (Sodium/proton a  | sp P0AFA7 NHAB_ECOLI                               | 56.730,50  | 100,00% | 2  | 3  | 3  | 0,06% | 4,87%  |
| Elongation factor G (EF-G).               | sp P0A6M8 EFG_ECOLI                                | 77.450,80  | 100,00% | 18 | 23 | 35 | 0,65% | 35,80% |
| Mannose permease IIC component (PTS syst  | sp P69801 PTNC_ECOLI                               | 27.636,40  | 100,00% | 2  | 2  | 3  | 0,06% | 11,70% |
| RNA polymerase sigma factor rpoD (Sigma-  | sp P00579 RPOD_ECOLI                               | 70.265,30  | 100,00% | 4  | 5  | 5  | 0,09% | 6,69%  |
| 30S ribosomal protein S16.                | sp P0A7T3 RS16_ECOLI                               | 9.190,60   | 95,70%  | 1  | 1  | 1  | 0,02% | 13,40% |

|                                           |                      |            |         |    |    |    |       |        |
|-------------------------------------------|----------------------|------------|---------|----|----|----|-------|--------|
| Protein-export membrane protein secD.     | sp P0AG90 SECD_ECOLI | 66.634,50  | 100,00% | 14 | 14 | 16 | 0,30% | 28,30% |
| RNA polymerase associated protein rapA (  | sp P60240 RAPA_ECOLI | 109.640,50 | 100,00% | 3  | 3  | 3  | 0,06% | 3,21%  |
| Preprotein translocase secY subunit.      | sp P0AGA2 SECY_ECOLI | 48.514,00  | 100,00% | 3  | 4  | 4  | 0,07% | 8,80%  |
| Protein ydgH precursor.                   | sp P76177 YDGH_ECOLI | 33.903,30  | 96,60%  | 1  | 1  | 1  | 0,02% | 3,82%  |
| GTP cyclohydrolase I (EC 3.5.4.16) (GTP-  | sp P0A6T5 GCH1_ECOLI | 24.699,80  | 100,00% | 5  | 6  | 7  | 0,13% | 28,10% |
| Oligopeptidase A (EC 3.4.24.70).          | sp P27298 OPDA_ECOLI | 77.169,50  | 95,00%  | 1  | 1  | 1  | 0,02% | 1,62%  |
| Organic solvent tolerance protein precur  | sp P31554 OSTA_ECOLI | 89.672,80  | 100,00% | 13 | 16 | 20 | 0,37% | 20,40% |
| Superoxide dismutase [Mn] (EC 1.15.1.1)   | sp P00448 SODM_ECOLI | 22.966,60  | 100,00% | 5  | 6  | 11 | 0,21% | 20,50% |
| Lipoprotein bor homolog from lambdaoid pr | sp P77330 BORD_ECOLI | 10.447,30  | 97,30%  | 1  | 1  | 1  | 0,02% | 10,30% |
| Cell division protein ftsY.               | sp P10121 FTSY_ECOLI | 54.512,50  | 97,30%  | 1  | 1  | 1  | 0,02% | 2,01%  |
| DNA gyrase subunit B (EC 5.99.1.3).       | sp P0AES6 GYRB_ECOLI | 89.820,80  | 100,00% | 5  | 5  | 5  | 0,09% | 7,85%  |
| Keratin, type I cytoskeletal 9            | K1C9_HUMAN           | 62.131,00  | 100,00% | 3  | 3  | 3  | 0,06% | 8,35%  |
| Methionine synthase (EC 2.1.1.13) (5-met  | sp P13009 METH_ECOLI | 135.868,30 | 100,00% | 3  | 3  | 3  | 0,06% | 3,10%  |
| Alanyl-tRNA synthetase (EC 6.1.1.7) (Ala  | sp P00957 SYA_ECOLI  | 96.033,60  | 100,00% | 35 | 43 | 60 | 1,12% | 44,50% |
| Glutamine transport ATP-binding protein   | sp P10346 GLNQ_ECOLI | 26.731,30  | 100,00% | 2  | 2  | 2  | 0,04% | 12,90% |
| Spermidine/putrescine transport system p  | sp P0AFK4 POTB_ECOLI | 31.064,80  | 99,40%  | 2  | 2  | 2  | 0,04% | 6,91%  |
| Succinyl-CoA synthetase alpha chain (EC   | sp P0AGE9 SUCD_ECOLI | 29.646,60  | 100,00% | 6  | 6  | 7  | 0,13% | 22,20% |
| Hypothetical protein ycfM.                | sp P0AB38 YCFM_ECOLI | 22.515,20  | 100,00% | 2  | 2  | 3  | 0,06% | 12,70% |
| Adenylosuccinate lyase (EC 4.3.2.2) (Ade  | sp P0AB89 PUR8_ECOLI | 51.544,10  | 100,00% | 7  | 7  | 9  | 0,17% | 16,40% |
| Chromosome partition protein mukB (Struc  | sp P22523 MUKB_ECOLI | 170.232,70 | 99,90%  | 2  | 2  | 2  | 0,04% | 1,08%  |
| Apolipoprotein N-acyltransferase (EC 2.3  | sp P23930 LNT_ECOLI  | 57.068,90  | 99,40%  | 2  | 2  | 2  | 0,04% | 4,49%  |
| Glucose-6-phosphate isomerase (EC 5.3.1.  | sp P0A6T1 G6PI_ECOLI | 61.531,40  | 100,00% | 3  | 3  | 3  | 0,06% | 6,56%  |
| Rare lipoprotein B precursor.             | sp P0ADC1 RLPB_ECOLI | 21.357,30  | 100,00% | 5  | 5  | 6  | 0,11% | 31,60% |
| L-threonine 3-dehydrogenase (EC 1.1.1.10  | sp P07913 TDH_ECOLI  | 37.239,60  | 96,10%  | 1  | 1  | 1  | 0,02% | 3,23%  |
| Hypothetical oxidoreductase yqhD (EC 1.1  | sp Q46856 YQHD_ECOLI | 42.097,60  | 100,00% | 2  | 2  | 2  | 0,04% | 5,94%  |
| Hypothetical lipoprotein ydCL precursor.  | sp P64451 YDCL_ECOLI | 24.427,30  | 100,00% | 4  | 4  | 4  | 0,07% | 21,60% |
| ATP-dependent Clp protease ATP-binding s  | sp P0ABH9 CLPA_ECOLI | 84.208,30  | 100,00% | 6  | 6  | 7  | 0,13% | 9,63%  |
| Outer membrane protein C precursor (Pori  | sp P06996 OMPC_ECOLI | 40.369,00  | 100,00% | 7  | 7  | 9  | 0,17% | 22,60% |
| 50S ribosomal protein L15.                | sp P02413 RL15_ECOLI | 14.981,10  | 100,00% | 5  | 5  | 5  | 0,09% | 39,60% |
| NAD(P) transhydrogenase subunit beta (EC  | sp P0AB67 PNTB_ECOLI | 48.724,00  | 100,00% | 5  | 7  | 7  | 0,13% | 11,50% |
| Branched-chain amino acid transport syst  | sp P0AD99 BRNQ_ECOLI | 46.209,90  | 96,10%  | 1  | 1  | 1  | 0,02% | 3,19%  |

|                                          |                      |           |         |    |    |     |       |        |
|------------------------------------------|----------------------|-----------|---------|----|----|-----|-------|--------|
| Tryptophanyl-tRNA synthetase (EC 6.1.1.2 | sp P00954 SYW_ECOLI  | 37.438,40 | 99,80%  | 2  | 2  | 2   | 0,04% | 6,59%  |
| ADP-L-glycero-D-manno-heptose-6-epimeras | sp P67910 HLDD_ECOLI | 34.894,30 | 100,00% | 10 | 10 | 15  | 0,28% | 35,50% |
| Hypothetical protein yiaF.               | sp P0ADK0 YIAF_ECOLI | 30.158,60 | 100,00% | 5  | 6  | 7   | 0,13% | 24,60% |
| Phosphate acetyltransferase (EC 2.3.1.8) | sp P0A9M8 PTA_ECOLI  | 77.041,50 | 100,00% | 19 | 23 | 33  | 0,62% | 31,60% |
| 50S ribosomal protein L10 (50S ribosomal | sp P0A7J3 RL10_ECOLI | 17.580,60 | 100,00% | 9  | 13 | 33  | 0,62% | 51,80% |
| 30S ribosomal protein S4.                | sp P0A7V8 RS4_ECOLI  | 23.338,50 | 100,00% | 3  | 3  | 3   | 0,06% | 13,20% |
| Peroxidase/catalase HPI (EC 1.11.1.6) (C | sp P13029 CATA_ECOLI | 80.025,80 | 100,00% | 27 | 39 | 82  | 1,53% | 39,80% |
| Ribose transport system permease protein | sp P0AGI1 RBSC_ECOLI | 33.452,90 | 96,10%  | 1  | 1  | 1   | 0,02% | 4,05%  |
| Ubiquinol oxidase polypeptide II precurs | sp P0ABJ1 CYOA_ECOLI | 34.912,30 | 100,00% | 7  | 9  | 16  | 0,30% | 31,10% |
| S-adenosylmethionine synthetase (EC 2.5. | sp P0A817 METK_ECOLI | 41.820,90 | 100,00% | 3  | 3  | 3   | 0,06% | 7,57%  |
| 3-oxoacyl-[acyl-carrier-protein] synthas | sp P0A953 FABB_ECOLI | 42.613,40 | 99,80%  | 1  | 1  | 1   | 0,02% | 2,46%  |
| Peptidyl-prolyl cis-trans isomerase D (E | sp P0ADY1 PPID_ECOLI | 68.151,40 | 100,00% | 11 | 12 | 15  | 0,28% | 23,80% |
| NADH dehydrogenase (EC 1.6.99.3).        | sp P00393 DHNA_ECOLI | 47.228,80 | 100,00% | 13 | 16 | 22  | 0,41% | 40,40% |
| 30S ribosomal protein S2.                | sp P0A7V0 RS2_ECOLI  | 26.613,10 | 100,00% | 6  | 6  | 9   | 0,17% | 28,30% |
| Hypothetical lipoprotein yifL precursor. | sp P0ADN6 YIFL_ECOLI | 7.177,40  | 94,70%  | 1  | 2  | 4   | 0,07% | 34,30% |
| Putative lipoprotein yceB precursor.     | sp P0AB26 YCEB_ECOLI | 20.500,30 | 100,00% | 1  | 1  | 1   | 0,02% | 6,45%  |
| 30S ribosomal protein S6 [Contains: 30S  | sp P02358 RS6_ECOLI  | 15.703,30 | 96,10%  | 1  | 1  | 1   | 0,02% | 8,15%  |
| UPF0304 protein yfbU.                    | sp P0A8W8 YFBU_ECOLI | 19.536,50 | 99,70%  | 1  | 1  | 1   | 0,02% | 9,15%  |
| UPF0169 lipoprotein yfiO precursor.      | sp P0AC02 YFIO_ECOLI | 27.830,30 | 100,00% | 6  | 6  | 8   | 0,15% | 27,80% |
| Phenylalanyl-tRNA synthetase beta chain  | sp P07395 SYFB_ECOLI | 87.378,60 | 100,00% | 36 | 46 | 116 | 2,17% | 47,20% |
| Anthranilate synthase component I (EC 4. | sp P00895 TRPE_ECOLI | 57.495,80 | 100,00% | 8  | 8  | 8   | 0,15% | 17,30% |
| D-3-phosphoglycerate dehydrogenase (EC 1 | sp P0A9T0 SERA_ECOLI | 44.045,90 | 100,00% | 9  | 9  | 11  | 0,21% | 27,40% |
| Entericidin B precursor.                 | sp P0ADB7 ECNB_ECOLI | 4.809,50  | 96,10%  | 1  | 1  | 1   | 0,02% | 39,60% |
| Uridine phosphorylase (EC 2.4.2.3) (UrdP | sp P12758 UDP_ECOLI  | 27.027,50 | 100,00% | 4  | 4  | 4   | 0,07% | 18,30% |
| NAD(P) transhydrogenase subunit alpha (E | sp P07001 PNTA_ECOLI | 54.623,70 | 100,00% | 4  | 4  | 4   | 0,07% | 9,61%  |
| 50S ribosomal protein L25.               | sp P68919 RL25_ECOLI | 10.693,60 | 100,00% | 5  | 5  | 8   | 0,15% | 44,70% |
| Nucleoside permease nupC (Nucleoside-tra | sp P0AFF2 NUPC_ECOLI | 43.477,70 | 100,00% | 2  | 2  | 3   | 0,06% | 5,00%  |
| Glycerol uptake facilitator protein (Aqu | sp P0AER0 GLPF_ECOLI | 29.780,60 | 96,10%  | 1  | 1  | 1   | 0,02% | 4,27%  |
| Peptidoglycan-associated lipoprotein pre | sp P0A912 PAL_ECOLI  | 18.824,50 | 100,00% | 7  | 9  | 13  | 0,24% | 57,20% |
| Trypsin precursor                        | TRYP_PIG             | 24.409,30 | 100,00% | 7  | 8  | 35  | 0,65% | 20,80% |
| Proline/betaine transporter (Proline por | sp P0COL7 PROP_ECOLI | 54.848,50 | 100,00% | 2  | 2  | 2   | 0,04% | 5,60%  |
| D-methionine-binding lipoprotein metQ pr | sp P28635 METQ_ECOLI | 29.431,90 | 100,00% | 12 | 15 | 27  | 0,50% | 53,50% |
| 3-phenylpropionate                       | sp P0ABR5 HCAE_ECOLI | 51.109    | 97,80%  | 1  | 1  | 1   | 0,02% | 2,21%  |

|                                          |                       |           |         |    |    |    |       |        |
|------------------------------------------|-----------------------|-----------|---------|----|----|----|-------|--------|
| dioxygenase alpha sub                    |                       | ,70       |         |    |    |    |       |        |
| 30S ribosomal protein S9.                | sp P0A7X3 RS9_ECOLI   | 14.725,40 | 100,00% | 2  | 2  | 2  | 0,04% | 15,50% |
| Glycerol kinase (EC 2.7.1.30) (ATP:glyce | sp P0A6F3 GLPK_ECOLI  | 56.100,10 | 100,00% | 6  | 6  | 6  | 0,11% | 14,40% |
| Elongation factor Tu (EF-Tu) (P-43).     | sp P0A6N1 EFTU_ECOLI  | 43.182,60 | 100,00% | 19 | 23 | 52 | 0,97% | 56,20% |
| Aerobic glycerol-3-phosphate dehydrogena | sp P13035 GLPD_ECOLI  | 56.752,30 | 100,00% | 7  | 8  | 10 | 0,19% | 13,00% |
| Bifunctional aspartokinase/homoserine de | sp P00561 AK1H_ECOLI  | 89.121,90 | 99,80%  | 1  | 1  | 1  | 0,02% | 1,59%  |
| Keratin, type I cytoskeletal 10          | K1C10_HUMAN           | 59.520,30 | 100,00% | 3  | 3  | 3  | 0,06% | 5,06%  |
| Glycyl-tRNA synthetase alpha chain (EC 6 | sp P00960 SYGA_ECOLI  | 34.774,90 | 100,00% | 4  | 4  | 4  | 0,07% | 12,50% |
| Phosphoglucosamine mutase (EC 5.4.2.10). | sp P31120 GLMM_ECOLI  | 47.413,30 | 99,90%  | 2  | 2  | 2  | 0,04% | 6,31%  |
| 3-oxoacyl-[acyl-carrier-protein] reducta | sp P0AEK2 FABG_ECOLI  | 25.561,00 | 100,00% | 10 | 22 | 39 | 0,73% | 50,00% |
| Delta-aminolevulinic acid dehydratase (E | sp P0ACB2 HEM2_ECOLI  | 35.494,70 | 100,00% | 2  | 2  | 2  | 0,04% | 6,81%  |
| Phosphoglycerate kinase (EC 2.7.2.3).    | sp P0A799 PGK_ECOLI   | 40.988,00 | 96,10%  | 1  | 1  | 1  | 0,02% | 3,63%  |
| Cell division protein zipA.              | sp P77173 ZIPIA_ECOLI | 36.474,50 | 99,90%  | 2  | 2  | 2  | 0,04% | 9,76%  |
| NADH-quinone oxidoreductase chain F (EC  | sp P31979 NUOF_ECOLI  | 49.294,50 | 96,10%  | 1  | 1  | 1  | 0,02% | 2,92%  |
| Putative HTH-type transcriptional regula | sp P27434 YFGA_ECOLI  | 36.191,50 | 100,00% | 2  | 2  | 2  | 0,04% | 9,20%  |
| Fructose-bisphosphate aldolase class II  | sp P0AB71 ALF_ECOLI   | 39.016,10 | 100,00% | 5  | 5  | 7  | 0,13% | 16,50% |
| UTP-glucose-1-phosphate uridylyltransfe  | sp P0AAB6 GALF_ECOLI  | 32.830,10 | 96,10%  | 1  | 1  | 2  | 0,04% | 4,04%  |
| MltA-interacting protein precursor.      | sp P0A908 MIPA_ECOLI  | 27.831,90 | 100,00% | 3  | 4  | 5  | 0,09% | 16,50% |
| Inner membrane lipoprotein yiaD precurso | sp P37665 YIAD_ECOLI  | 22.197,60 | 100,00% | 2  | 3  | 3  | 0,06% | 16,40% |
| Protein recA (Recombinase A).            | sp P0A7G6 RECA_ECOLI  | 37.843,50 | 100,00% | 4  | 4  | 4  | 0,07% | 14,80% |
| ATP-dependent protease hslV (EC 3.4.25.- | sp P0A7B8 HSLV_ECOLI  | 18.962,10 | 100,00% | 5  | 5  | 8  | 0,15% | 30,30% |
| Long-chain fatty acid transport protein  | sp P10384 FADL_ECOLI  | 48.773,40 | 100,00% | 3  | 3  | 3  | 0,06% | 8,93%  |
| ATP synthase B chain (EC 3.6.3.14).      | sp P0ABA0 ATPF_ECOLI  | 17.264,50 | 100,00% | 12 | 15 | 19 | 0,36% | 56,40% |
| Hypothetical protein yraM.               | sp P45464 YRAM_ECOLI  | 72.825,80 | 100,00% | 2  | 2  | 2  | 0,04% | 3,54%  |
| PTS system mannose-specific EIIAB compon | sp P69797 PTNAB_ECOLI | 34.916,20 | 100,00% | 9  | 12 | 23 | 0,43% | 26,10% |
| Hypothetical UPF0070 protein yfgM.       | sp P76576 YFGM_ECOLI  | 22.176,40 | 100,00% | 2  | 2  | 2  | 0,04% | 21,40% |
| Aldehyde-alcohol dehydrogenase [Includes | sp P0A9Q7 ADHE_ECOLI  | 95.998,90 | 96,10%  | 1  | 1  | 1  | 0,02% | 1,69%  |
| 50S ribosomal protein L1.                | sp P0A7L0 RL1_ECOLI   | 24.598,20 | 100,00% | 5  | 6  | 6  | 0,11% | 29,20% |
| ATP-dependent protease La (EC 3.4.21.53) | sp P0A9M0 LON_ECOLI   | 87.440,60 | 100,00% | 9  | 9  | 11 | 0,21% | 12,60% |
| Small-conductance mechanosensitive chann | sp P0C0S1 MSCS_ECOLI  | 30.897,00 | 100,00% | 2  | 2  | 2  | 0,04% | 8,04%  |

|                                          |                       |            |         |    |    |    |       |        |
|------------------------------------------|-----------------------|------------|---------|----|----|----|-------|--------|
| Protein rcsF.                            | sp P69411 RCSF_ECOLI  | 14.163,50  | 96,10%  | 1  | 1  | 1  | 0,02% | 10,40% |
| Hypothetical protein yggT.               | sp P64564 YGGT_ECOLI  | 21.168,60  | 99,90%  | 2  | 2  | 2  | 0,04% | 11,20% |
| 30S ribosomal protein S10.               | sp P0A7R5 RS10_ECOLI  | 11.735,80  | 100,00% | 2  | 2  | 2  | 0,04% | 23,30% |
| DNA gyrase subunit A (EC 5.99.1.3).      | sp P0AES4 GYRA_ECOLI  | 96.965,00  | 100,00% | 16 | 16 | 18 | 0,34% | 21,30% |
| Transport ATP-binding protein cydD.      | sp P29018 CYDD_ECOLI  | 65.058,60  | 100,00% | 2  | 2  | 2  | 0,04% | 4,25%  |
| Transcription antitermination protein nu | sp P0AFG0 NUSG_ECOLI  | 20.399,80  | 96,10%  | 1  | 1  | 1  | 0,02% | 7,22%  |
| Inner membrane transport protein ydhC.   | sp P37597 YDHC_ECOLI  | 43.368,60  | 96,10%  | 1  | 1  | 1  | 0,02% | 3,47%  |
| Alpha-ketoglutarate permease.            | sp P0AEX3 KGTP_ECOLI  | 47.054,00  | 96,10%  | 1  | 1  | 1  | 0,02% | 2,55%  |
| Acetyl-coenzyme A carboxylase carboxyl t | sp P0A9Q5 ACCD_ECOLI  | 33.322,50  | 99,40%  | 1  | 1  | 1  | 0,02% | 3,29%  |
| 50S ribosomal protein L9.                | sp P0A7R1 RL9_ECOLI   | 15.768,70  | 100,00% | 2  | 2  | 2  | 0,04% | 19,50% |
| PTS system trehalose-specific EIIBC comp | sp P36672 PTTBC_ECOLI | 51.082,60  | 100,00% | 8  | 9  | 14 | 0,26% | 14,60% |
| Antigen 43 precursor (AG43) (Fluffing pr | sp P39180 AG43_ECOLI  | 106.823,60 | 100,00% | 12 | 14 | 14 | 0,26% | 16,90% |
| Tail-specific protease precursor (EC 3.4 | sp P23865 PRC_ECOLI   | 76.665,70  | 99,80%  | 1  | 1  | 1  | 0,02% | 1,91%  |
| Glucose-6-phosphate 1-dehydrogenase (EC  | sp P0AC53 G6PD_ECOLI  | 55.705,70  | 99,90%  | 1  | 1  | 1  | 0,02% | 2,04%  |
| Hypothetical protein yfdI.               | sp P76507 YFDI_ECOLI  | 51.487,90  | 100,00% | 3  | 4  | 4  | 0,07% | 7,45%  |
| Aldehyde dehydrogenase A (EC 1.2.1.22) ( | sp P25553 ALDA_ECOLI  | 52.142,10  | 99,80%  | 2  | 2  | 2  | 0,04% | 3,77%  |
| Threonyl-tRNA synthetase (EC 6.1.1.3) (T | sp P0A8M3 SYT_ECOLI   | 74.015,60  | 100,00% | 9  | 9  | 9  | 0,17% | 14,30% |
| 30S ribosomal protein S7.                | sp P02359 RS7_ECOLI   | 19.888,10  | 99,20%  | 2  | 2  | 2  | 0,04% | 14,60% |
| Glutamine transport system permease prot | sp P0AEQ6 GLNP_ECOLI  | 24.365,90  | 99,80%  | 1  | 1  | 1  | 0,02% | 5,02%  |
| Multidrug resistance protein mdtB (Multi | sp P76398 MDTB_ECOLI  | 112.081,10 | 98,00%  | 1  | 1  | 1  | 0,02% | 0,96%  |
| Prolyl-tRNA synthetase (EC 6.1.1.15) (Pr | sp P16659 SYP_ECOLI   | 63.693,40  | 100,00% | 3  | 3  | 3  | 0,06% | 7,17%  |
| 30S ribosomal protein S13.               | sp P0A7S9 RS13_ECOLI  | 12.968,90  | 100,00% | 5  | 5  | 5  | 0,09% | 52,10% |
| Lysyl-tRNA synthetase (EC 6.1.1.6) (Lysi | sp P0A8N3 SYK1_ECOLI  | 57.474,30  | 99,80%  | 1  | 1  | 1  | 0,02% | 2,38%  |
| Outer membrane protein X precursor.      | sp P0A917 OMPX_ECOLI  | 18.603,00  | 100,00% | 5  | 9  | 12 | 0,22% | 37,40% |
| Preprotein translocase secA subunit.     | sp P10408 SECA_ECOLI  | 102.025,30 | 100,00% | 13 | 13 | 13 | 0,24% | 16,60% |
| UDP-galactopyranose mutase (EC 5.4.99.9) | sp P37747 GLF_ECOLI   | 42.967,60  | 99,90%  | 2  | 2  | 2  | 0,04% | 5,72%  |
| Bifunctional aspartokinase/homoserine de | sp P00562 AK2H_ECOLI  | 88.757,50  | 99,70%  | 1  | 1  | 1  | 0,02% | 0,99%  |
| Enolase (EC 4.2.1.11) (2-phosphoglycerat | sp P0A6P9 ENO_ECOLI   | 45.525,50  | 100,00% | 8  | 8  | 9  | 0,17% | 23,70% |
| Transcription termination factor rho (EC | sp P0AG30 RHO_ECOLI   | 47.006,30  | 100,00% | 2  | 2  | 2  | 0,04% | 8,11%  |
| 3-octaprenyl-4-hydroxybenzoate carboxyl  | sp P0AAB4 UBID_ECOLI  | 55.604,80  | 99,10%  | 1  | 1  | 1  | 0,02% | 2,41%  |
| Diaminopimelate decarboxylase (EC 4.1.1. | sp P00861 DCDA_ECOLI  | 46.176,60  | 96,10%  | 1  | 1  | 1  | 0,02% | 2,62%  |
| Glycine dehydrogenase [decarboxylating]  | sp P33195 GCSP_ECOLI  | 104.246,10 | 100,00% | 3  | 3  | 3  | 0,06% | 3,77%  |



|                                          |                      |           |         |    |    |    |       |        |
|------------------------------------------|----------------------|-----------|---------|----|----|----|-------|--------|
| Hypothetical protein yibN.               | sp P0AG27 YIBN_ECOLI | 15.596,20 | 100,00% | 4  | 5  | 5  | 0,09% | 32,90% |
| Phosphoenolpyruvate-protein phosphotrans | sp P08839 PT1_ECOLI  | 63.564,30 | 100,00% | 4  | 4  | 4  | 0,07% | 8,35%  |
| 50S ribosomal protein L24.               | sp P60624 RL24_ECOLI | 11.185,10 | 96,10%  | 1  | 1  | 1  | 0,02% | 9,71%  |
| Low-affinity inorganic phosphate transpo | sp P0AFJ7 PITA_ECOLI | 53.390,90 | 99,10%  | 1  | 1  | 1  | 0,02% | 2,00%  |
| Gamma-glutamyl phosphate reductase (GPR) | sp P07004 PROA_ECOLI | 44.630,40 | 100,00% | 7  | 7  | 9  | 0,17% | 20,40% |
| ATP-dependent Clp protease ATP-binding s | sp P0A6H1 CLPX_ECOLI | 46.226,10 | 100,00% | 8  | 8  | 8  | 0,15% | 25,10% |
| Rod shape-determining protein mreB.      | sp P0A9X4 MRB_ECOLI  | 36.952,40 | 100,00% | 6  | 6  | 6  | 0,11% | 22,80% |
| Cysteine synthase B (EC 2.5.1.47) (O-ace | sp P16703 CYSM_ECOLI | 32.664,60 | 95,80%  | 1  | 1  | 1  | 0,02% | 4,29%  |
| NADP-specific glutamate dehydrogenase (E | sp P00370 DHE4_ECOLI | 48.581,20 | 100,00% | 7  | 7  | 7  | 0,13% | 21,30% |
| Small protein A precursor.               | sp P0A937 SMPA_ECOLI | 12.302,00 | 100,00% | 2  | 2  | 2  | 0,04% | 26,50% |
| Osmotically inducible lipoprotein E prec | sp P0ADB1 OSME_ECOLI | 12.020,50 | 100,00% | 4  | 5  | 5  | 0,09% | 29,50% |
| 50S ribosomal protein L7/L12 (L8).       | sp P0A7K2 RL7_ECOLI  | 12.163,80 | 100,00% | 5  | 6  | 15 | 0,28% | 36,70% |
| Protein-export membrane protein secG (Pr | sp P0AG99 SECG_ECOLI | 11.365,80 | 100,00% | 2  | 2  | 3  | 0,06% | 27,30% |
| Maltose transport system permease protei | sp P02916 MALF_ECOLI | 57.016,50 | 100,00% | 2  | 2  | 2  | 0,04% | 4,47%  |
| Seryl-tRNA synthetase (EC 6.1.1.11) (Ser | sp P0A8L1 SYS_ECOLI  | 48.414,80 | 100,00% | 2  | 2  | 2  | 0,04% | 4,88%  |
| Polyribonucleotide nucleotidyltransferas | sp P05055 PNP_ECOLI  | 77.101,00 | 100,00% | 21 | 28 | 42 | 0,78% | 38,50% |
| Tyrosyl-tRNA synthetase (EC 6.1.1.1) (Ty | sp P0AGJ9 SYY_ECOLI  | 47.397,00 | 100,00% | 2  | 2  | 2  | 0,04% | 6,15%  |
| Chaperone surA precursor (Peptidyl-proly | sp P0ABZ6 SURA_ECOLI | 47.284,70 | 100,00% | 5  | 5  | 6  | 0,11% | 14,00% |
| Protein ydgA precursor.                  | sp P77804 YDGA_ECOLI | 54.690,10 | 100,00% | 7  | 7  | 7  | 0,13% | 13,10% |
| Putative frv operon regulatory protein [ | sp P32152 FRVR_ECOLI | 66.002,40 | 97,90%  | 1  | 1  | 1  | 0,02% | 1,20%  |
| Periplasmic oligopeptide-binding protein | sp P23843 OPPA_ECOLI | 60.899,80 | 100,00% | 8  | 10 | 11 | 0,21% | 17,30% |
| ATP synthase alpha chain (EC 3.6.3.14).  | sp P0ABB0 ATPA_ECOLI | 55.223,20 | 100,00% | 21 | 24 | 44 | 0,82% | 48,90% |
| Citrate synthase (EC 2.3.3.1).           | sp P0ABH7 CISY_ECOLI | 48.016,80 | 100,00% | 10 | 17 | 27 | 0,50% | 28,80% |
| 3-hydroxydecanoyl-[acyl-carrier-protein] | sp P0A6Q3 FABA_ECOLI | 18.838,40 | 100,00% | 5  | 5  | 8  | 0,15% | 31,60% |
| Cysteine desulfurase (EC 2.8.1.7) (Thil  | sp P0A6B7 ISCS_ECOLI | 45.090,70 | 100,00% | 2  | 2  | 2  | 0,04% | 5,20%  |
| Methionyl-tRNA synthetase (EC 6.1.1.10)  | sp P00959 SYM_ECOLI  | 76.125,50 | 100,00% | 9  | 9  | 11 | 0,21% | 15,20% |
| Uridylate kinase (EC 2.7.4.-) (UK) (Urid | sp P0A7E9 PYRH_ECOLI | 25.839,70 | 96,10%  | 1  | 1  | 1  | 0,02% | 4,58%  |
| Chaperone clpB (Heat-shock protein F84.1 | sp P63284 CLPB_ECOLI | 95.587,90 | 100,00% | 22 | 28 | 35 | 0,65% | 32,70% |
| Outer membrane protein assembly factor y | sp P0A940 YAET_ECOLI | 90.554,40 | 100,00% | 19 | 23 | 33 | 0,62% | 30,70% |
| Soluble pyridine nucleotide transhydroge | sp P27306 STHA_ECOLI | 51.429,80 | 96,80%  | 1  | 1  | 1  | 0,02% | 1,51%  |
| Translation initiation factor IF-2.      | sp P0A705 IF2_ECOLI  | 97.349,00 | 100,00% | 21 | 23 | 26 | 0,49% | 26,60% |

|                                          |                       |            |         |    |    |     |       |        |
|------------------------------------------|-----------------------|------------|---------|----|----|-----|-------|--------|
| Pyruvate kinase I (EC 2.7.1.40) (PK-1).  | sp P0AD61 KPYK1_ECOLI | 50.729,90  | 100,00% | 12 | 14 | 18  | 0,34% | 29,40% |
| Hypothetical ABC transporter ATP-binding | sp P36879 YADG_ECOLI  | 34.648,40  | 100,00% | 2  | 2  | 2   | 0,04% | 6,49%  |
| Nucleoside permease nupG (Nucleoside-tra | sp P0AFF4 NUPG_ECOLI  | 46.391,50  | 99,90%  | 2  | 2  | 2   | 0,04% | 4,55%  |
| Multidrug resistance protein A.          | sp P27303 EMRA_ECOLI  | 42.736,10  | 99,90%  | 1  | 1  | 1   | 0,02% | 3,85%  |
| Major outer membrane lipoprotein precurs | sp P69776 LPP_ECOLI   | 8.323,70   | 100,00% | 6  | 13 | 67  | 1,25% | 48,70% |
| Hypothetical protein yfgG.               | sp P64545 YFGG_ECOLI  | 7.461,70   | 96,10%  | 1  | 1  | 1   | 0,02% | 23,80% |
| Bifunctional glmU protein [Includes: UDP | sp P0ACC7 GLMU_ECOLI  | 49.190,50  | 100,00% | 3  | 3  | 3   | 0,06% | 7,24%  |
| Hypothetical protein yoaF.               | sp P64493 YOAF_ECOLI  | 8.942,30   | 99,90%  | 1  | 1  | 1   | 0,02% | 21,40% |
| 50S ribosomal protein L28.               | sp P0A7M2 RL28_ECOLI  | 8.875,30   | 95,90%  | 1  | 1  | 1   | 0,02% | 13,00% |
| Glucans biosynthesis protein D precursor | sp P40120 OPGD_ECOLI  | 62.759,70  | 100,00% | 2  | 2  | 2   | 0,04% | 3,45%  |
| Putative cytochrome d ubiquinol oxidase  | sp P0ADW3 YHCB_ECOLI  | 15.239,80  | 99,80%  | 1  | 1  | 2   | 0,04% | 12,70% |
| Hypothetical protein yrbD precursor.     | sp P64604 YRBD_ECOLI  | 19.577,10  | 100,00% | 3  | 3  | 3   | 0,06% | 18,00% |
| Protein damX.                            | sp P11557 DAMX_ECOLI  | 46.161,50  | 99,90%  | 3  | 3  | 3   | 0,06% | 8,18%  |
| Hypothetical lipoprotein yajG precursor. | sp P0ADA5 YAJG_ECOLI  | 20.950,40  | 100,00% | 4  | 5  | 11  | 0,21% | 25,00% |
| Nucleoside-specific channel-forming prot | sp P0A927 TSX_ECOLI   | 33.590,20  | 100,00% | 2  | 2  | 6   | 0,11% | 8,16%  |
| Anaerobic C4-dicarboxylate transporter d | sp P0ABN5 DCUA_ECOLI  | 45.752,20  | 100,00% | 3  | 3  | 3   | 0,06% | 6,93%  |
| Protein tolB precursor.                  | sp P0A855 TOLB_ECOLI  | 45.955,10  | 100,00% | 7  | 8  | 9   | 0,17% | 21,20% |
| Bifunctional putA protein [Includes: Pro | sp P09546 PUTA_ECOLI  | 143.818,40 | 100,00% | 7  | 7  | 7   | 0,13% | 6,74%  |
| Ribosome recycling factor (Ribosome-rele | sp P0A805 RRF_ECOLI   | 20.639,30  | 100,00% | 8  | 10 | 19  | 0,36% | 44,30% |
| Protein yicC.                            | sp P23839 YICC_ECOLI  | 33.175,20  | 100,00% | 2  | 2  | 2   | 0,04% | 8,71%  |
| Ubiquinol oxidase polypeptide I (EC 1.10 | sp P0AB18 CYOB_ECOLI  | 74.370,10  | 100,00% | 5  | 7  | 12  | 0,22% | 8,75%  |
| Tyrosine-protein kinase wzc (EC 2.7.1.11 | sp P76387 WZC_ECOLI   | 79.345,10  | 100,00% | 2  | 3  | 4   | 0,07% | 3,61%  |
| GTP-binding protein typA/BipA (Tyrosine  | sp P32132 TYPA_ECOLI  | 67.356,00  | 100,00% | 5  | 6  | 6   | 0,11% | 9,56%  |
| ProP effector.                           | sp P45577 PROQ_ECOLI  | 25.892,40  | 95,30%  | 1  | 1  | 1   | 0,02% | 4,31%  |
| L-fucose isomerase (EC 5.3.1.25) (6-deox | sp P69922 FUCI_ECOLI  | 64.977,20  | 100,00% | 4  | 5  | 5   | 0,09% | 9,14%  |
| UPF0092 protein yajC.                    | sp P0ADZ7 YAJC_ECOLI  | 11.887,60  | 100,00% | 4  | 6  | 12  | 0,22% | 27,30% |
| Inner membrane protein yccF.             | sp P0AB12 YCCF_ECOLI  | 16.275,90  | 100,00% | 2  | 2  | 2   | 0,04% | 14,90% |
| Outer membrane protein A precursor (Oute | sp P0A910 OMPA_ECOLI  | 37.201,00  | 100,00% | 20 | 31 | 116 | 2,17% | 46,50% |
| 30S ribosomal protein S18.               | sp P0A7T7 RS18_ECOLI  | 8.855,80   | 100,00% | 2  | 2  | 3   | 0,06% | 29,70% |
| Probable formate transporter 1 (Formate  | sp P0AC23 FOCA_ECOLI  | 30.991,40  | 99,90%  | 1  | 1  | 1   | 0,02% | 3,16%  |
| Trigger factor (TF).                     | sp P0A850 TIG_ECOLI   | 48.192,90  | 100,00% | 6  | 7  | 9   | 0,17% | 17,40% |
| Outer membrane protein F precursor (Pori | sp P02931 OMPF_ECOLI  | 39.334,40  | 100,00% | 2  | 2  | 2   | 0,04% | 5,80%  |
| Malate dehydrogenase (EC 1.1.1.37).      | sp P61889 MDH_ECOLI   | 32.337,30  | 100,00% | 2  | 2  | 2   | 0,04% | 6,09%  |

|                                          |                       |           |         |    |    |    |       |        |
|------------------------------------------|-----------------------|-----------|---------|----|----|----|-------|--------|
| UPF0141 protein yjP.                     | sp P32678 YIJP_ECOLI  | 66.612,50 | 99,90%  | 2  | 2  | 2  | 0,04% | 5,72%  |
| Hypothetical protein yehM.               | sp P33349 YEHM_ECOLI  | 83.392,30 | 95,90%  | 1  | 1  | 1  | 0,02% | 1,05%  |
| Transaldolase B (EC 2.2.1.2).            | sp P0A870 TALB_ECOLI  | 35.089,70 | 100,00% | 5  | 5  | 5  | 0,09% | 17,70% |
| Periplasmic beta-glucosidase precursor ( | sp P33363 BGLX_ECOLI  | 83.461,40 | 100,00% | 6  | 6  | 6  | 0,11% | 10,10% |
| Macrolide-specific ABC-type efflux carri | sp P75831 MACB_ECOLI  | 70.702,90 | 99,60%  | 2  | 2  | 2  | 0,04% | 4,78%  |
| 30S ribosomal protein S5.                | sp P0A7W1 RS5_ECOLI   | 17.471,80 | 100,00% | 4  | 4  | 4  | 0,07% | 38,00% |
| Ribonucleoside-diphosphate reductase 1 a | sp P00452 RIR1_ECOLI  | 85.778,80 | 100,00% | 4  | 4  | 4  | 0,07% | 6,44%  |
| Lipoprotein vacJ precursor.              | sp P76506 VACJ_ECOLI  | 28.042,30 | 100,00% | 4  | 5  | 9  | 0,17% | 15,50% |
| Outer membrane protein tolC precursor.   | sp P02930 TOLC_ECOLI  | 54.015,20 | 100,00% | 9  | 12 | 12 | 0,22% | 24,00% |
| Sec-independent protein translocase prot | sp P69428 TATA_ECOLI  | 9.664,50  | 100,00% | 2  | 2  | 2  | 0,04% | 25,80% |
| ABC transporter periplasmic-binding prot | sp P39325 YTFQ_ECOLI  | 34.345,60 | 100,00% | 2  | 2  | 3  | 0,06% | 8,18%  |
| Putative sensor-like histidine kinase yf | sp P52101 YFHK_ECOLI  | 55.700,20 | 95,90%  | 1  | 1  | 1  | 0,02% | 2,42%  |
| Vitamin B12 transporter btuB precursor ( | sp P06129 BTUB_ECOLI  | 68.408,20 | 100,00% | 7  | 7  | 10 | 0,19% | 15,10% |
| Cytochrome d ubiquinol oxidase subunit I | sp P0ABK2 CYDB_ECOLI  | 42.454,10 | 100,00% | 3  | 7  | 10 | 0,19% | 7,65%  |
| Septum site-determining protein minD (Ce | sp P0AEZ3 MIND_ECOLI  | 29.484,10 | 96,10%  | 1  | 1  | 1  | 0,02% | 5,20%  |
| Magnesium and cobalt transport protein c | sp P0ABI4 CORA_ECOLI  | 36.591,40 | 100,00% | 5  | 6  | 8  | 0,15% | 18,70% |
| PTS system glucose-specific EIICB compon | sp P69786 PTGCB_ECOLI | 50.678,40 | 100,00% | 13 | 16 | 39 | 0,73% | 29,80% |
| NADH-quinone oxidoreductase chain C/D (E | sp P33599 NUOCD_ECOLI | 68.696,40 | 100,00% | 5  | 5  | 8  | 0,15% | 8,17%  |
| 60 kDa chaperonin (Protein Cpn60) (groEL | sp P0A6F5 CH60_ECOLI  | 57.197,70 | 100,00% | 25 | 34 | 78 | 1,46% | 56,70% |
| Protein hflC (EC 3.4.--).                | sp P0ABC3 HFLC_ECOLI  | 37.650,90 | 100,00% | 5  | 6  | 7  | 0,13% | 18,60% |
| Cytochrome d ubiquinol oxidase subunit I | sp P0ABJ9 CYDA_ECOLI  | 58.207,40 | 100,00% | 16 | 20 | 34 | 0,64% | 27,40% |
| Inner membrane protein yjgP.             | sp P0AF98 YJGP_ECOLI  | 40.358,90 | 100,00% | 3  | 3  | 3  | 0,06% | 8,47%  |

88 **Table S2. Proteins identified by Mass spectroscopy in the Native gel fragment of interest**  
 89 **excized from stationary phase lane (control)**

| Protein name                              | Protein accession numbers | Protein molecular weight (Da) | Protein identification probability | Exclusive unique peptide count | Exclusive unique spectrum count | Total spectrum count | Percentage of total spectra | Percentage sequence coverage |
|-------------------------------------------|---------------------------|-------------------------------|------------------------------------|--------------------------------|---------------------------------|----------------------|-----------------------------|------------------------------|
| Maltose/maltodextrin import ATP-binding   | sp P68187 MALK_ECOLI      | 40.989,90                     | 100,00%                            | 7                              | 9                               | 16                   | 0,29%                       | 22,10%                       |
| Hydroxylamine reductase (EC 1.7.-.-) (Hy  | sp P75825 HCP_ECOLI       | 60.065,50                     | 99,70%                             | 1                              | 1                               | 1                    | 0,02%                       | 1,64%                        |
| Phosphate-binding periplasmic protein pr  | sp P0AG82 PSTS_ECOLI      | 37.024,70                     | 100,00%                            | 10                             | 10                              | 12                   | 0,22%                       | 39,30%                       |
| Outer-membrane lipoprotein lolB precursor | sp P61320 LOLB_ECOLI      | 23.551,60                     | 96,30%                             | 1                              | 1                               | 1                    | 0,02%                       | 5,31%                        |
| Chaperone protein dnaK (Heat shock prote  | sp P0A6Y8 DNAK_ECOLI      | 68.984,90                     | 100,00%                            | 19                             | 22                              | 26                   | 0,48%                       | 37,20%                       |
| Mannose permease IID component (PTS syst  | sp P69805 PTND_ECOLI      | 31.304,00                     | 100,00%                            | 8                              | 10                              | 16                   | 0,29%                       | 32,50%                       |
| Hypothetical protein yqjD.                | sp P64581 YQJD_ECOLI      | 11.051,70                     | 100,00%                            | 2                              | 3                               | 5                    | 0,09%                       | 25,70%                       |
| Aminoacyl-histidine dipeptidase (EC 3.4.  | sp P15288 PEPD_ECOLI      | 52.785,30                     | 100,00%                            | 7                              | 8                               | 10                   | 0,18%                       | 17,10%                       |
| D-ribose-binding periplasmic protein pre  | sp P02925 RBSB_ECOLI      | 30.950,50                     | 100,00%                            | 13                             | 31                              | 86                   | 1,58%                       | 53,40%                       |
| Rod shape-determining protein mreC.       | sp P16926 MREC_ECOLI      | 39.530,60                     | 96,30%                             | 1                              | 1                               | 1                    | 0,02%                       | 3,54%                        |
| Preprotein translocase secY subunit.      | sp P0AGA2 SECY_ECOLI      | 48.514,00                     | 100,00%                            | 2                              | 3                               | 3                    | 0,06%                       | 5,87%                        |
| PTS system maltose- and glucose-specific  | sp P19642 PTOCB_ECOLI     | 56.628,40                     | 96,70%                             | 1                              | 1                               | 1                    | 0,02%                       | 2,26%                        |
| Fumarate hydratase class I, aerobic (EC   | sp P0AC33 FUMA_ECOLI      | 60.169,10                     | 100,00%                            | 4                              | 4                               | 4                    | 0,07%                       | 10,60%                       |
| Low-specificity L-threonine aldolase (EC  | sp P75823 LTAE_ECOLI      | 36.495,40                     | 100,00%                            | 2                              | 2                               | 2                    | 0,04%                       | 7,51%                        |
| Uronate isomerase (EC 5.3.1.12) (Glucuro  | sp P0A8G3 UXAC_ECOLI      | 53.989,00                     | 99,70%                             | 1                              | 1                               | 1                    | 0,02%                       | 2,13%                        |
| Hypothetical protein yjeI precursor.      | sp P0AF70 YJEI_ECOLI      | 11.958,30                     | 99,90%                             | 1                              | 1                               | 2                    | 0,04%                       | 16,20%                       |
| NADH-quinone oxidoreductase chain G (EC   | sp P33602 NUOG_ECOLI      | 100.168,30                    | 100,00%                            | 8                              | 9                               | 10                   | 0,18%                       | 9,70%                        |
| Aconitate hydratase 2 (EC 4.2.1.3) (Citr  | sp P36683 ACON2_ECOLI     | 93.501,00                     | 100,00%                            | 13                             | 13                              | 18                   | 0,33%                       | 18,50%                       |
| Protein ycaC.                             | sp P21367 YCAC_ECOLI      | 23.100,90                     | 100,00%                            | 4                              | 6                               | 9                    | 0,17%                       | 22,60%                       |
| Trypsin precursor                         | TRYP_PIG                  | 24.409,30                     | 100,00%                            | 6                              | 7                               | 30                   | 0,55%                       | 16,50%                       |
| 50S ribosomal protein L7/L12 (L8).        | sp P0A7K2 RL7_ECOLI       | 12.163,80                     | 100,00%                            | 5                              | 6                               | 11                   | 0,20%                       | 36,70%                       |
| Hypothetical UPF0135 protein ybgl.        | sp P0AFP6 YBGI_ECOLI      | 26.892,70                     | 100,00%                            | 2                              | 4                               | 4                    | 0,07%                       | 14,60%                       |
| Hypothetical protein yefG (GalF transfer  | sp P37749 YIEG_ECOLI      | 37.759,10                     | 100,00%                            | 1                              | 1                               | 1                    | 0,02%                       | 3,33%                        |
| Succinyl-CoA synthetase beta chain (EC 6  | sp P0A836 SUCC_ECOLI      | 41.392,70                     | 100,00%                            | 17                             | 24                              | 34                   | 0,62%                       | 49,50%                       |
| Hypothetical protein yiaF.                | sp P0ADK0 YIAF_ECOLI      | 30.158,60                     | 100,00%                            | 5                              | 6                               | 6                    | 0,11%                       | 24,60%                       |
| Protein ygaU.                             | sp P0ADE6 YGAU_ECOLI      | 15.932,20                     | 100,00%                            | 3                              | 3                               | 3                    | 0,06%                       | 23,00%                       |
| 50S ribosomal protein L22.                | sp P61175 RL22_ECOLI      | 12.226,60                     | 100,00%                            | 2                              | 2                               | 2                    | 0,04%                       | 20,90%                       |
| Fumarate hydratase class II (EC 4.2.1.2)  | sp P05042 FUMC_ECOLI      | 50.489,50                     | 95,20%                             | 1                              | 1                               | 1                    | 0,02%                       | 3,85%                        |
| Serine hydroxymethyltransferase (EC 2.1.  | sp P0A825 GLYA_ECOLI      | 45.316,70                     | 100,00%                            | 4                              | 5                               | 6                    | 0,11%                       | 11,00%                       |

|                                          |                       |            |         |    |    |    |       |        |
|------------------------------------------|-----------------------|------------|---------|----|----|----|-------|--------|
| 6-phosphogluconate dehydrogenase, decarb | sp P00350 6PGD_ECOLI  | 51.483,20  | 100,00% | 9  | 9  | 9  | 0,17% | 28,20% |
| Pyrraline-5-carboxylate reductase (EC 1. | sp P0A9L8 PROC_ECOLI  | 28.145,00  | 100,00% | 5  | 8  | 12 | 0,22% | 24,50% |
| Protein yhdH.                            | sp P26646 YHDH_ECOLI  | 34.723,50  | 100,00% | 2  | 2  | 2  | 0,04% | 6,48%  |
| Cation/acetate symporter actP (Acetate t | sp P32705 ACTP_ECOLI  | 59.200,00  | 99,90%  | 2  | 2  | 2  | 0,04% | 3,83%  |
| Tripeptide permease tppB.                | sp P77304 TPPB_ECOLI  | 53.993,30  | 96,30%  | 1  | 1  | 1  | 0,02% | 2,60%  |
| Serine transporter.                      | sp P0AAD6 SDAC_ECOLI  | 46.909,00  | 100,00% | 4  | 5  | 6  | 0,11% | 9,56%  |
| Succinate dehydrogenase flavoprotein sub | sp P0AC41 DHSA_ECOLI  | 64.421,90  | 100,00% | 3  | 3  | 3  | 0,06% | 5,95%  |
| Pyruvate kinase I (EC 2.7.1.40) (PK-1).  | sp P0AD61 KPYK1_ECOLI | 50.729,90  | 100,00% | 16 | 18 | 29 | 0,53% | 37,40% |
| Adenylate kinase (EC 2.7.4.3) (ATP-AMP t | sp P69441 KAD_ECOLI   | 23.586,40  | 100,00% | 4  | 4  | 6  | 0,11% | 22,00% |
| Peroxiredoxin osmC (EC 1.11.1.15) (Osmot | sp P0COL2 OSMC_ECOLI  | 14.957,30  | 99,80%  | 1  | 1  | 1  | 0,02% | 13,40% |
| Maltose-binding periplasmic protein prec | sp P0AEX9 MALE_ECOLI  | 43.389,90  | 100,00% | 13 | 15 | 22 | 0,40% | 41,90% |
| Valyl-tRNA synthetase (EC 6.1.1.9) (Vali | sp P07118 SYV_ECOLI   | 108.195,30 | 100,00% | 5  | 5  | 5  | 0,09% | 7,26%  |
| Succinate-semialdehyde dehydrogenase [NA | sp P25526 GABD_ECOLI  | 51.721,60  | 100,00% | 4  | 4  | 4  | 0,07% | 10,60% |
| Periplasmic dipeptide transport protein  | sp P23847 DPPA_ECOLI  | 60.294,60  | 100,00% | 6  | 7  | 9  | 0,17% | 13,60% |
| GMP synthase [glutamine-hydrolyzing] (EC | sp P04079 GUAA_ECOLI  | 58.679,20  | 100,00% | 1  | 1  | 1  | 0,02% | 2,67%  |
| Lipoprotein 34 precursor.                | sp P0A903 NLPB_ECOLI  | 36.842,30  | 96,30%  | 1  | 1  | 1  | 0,02% | 5,52%  |
| Protease VII precursor (EC 3.4.23.-) (Om | sp P09169 OMPT_ECOLI  | 35.563,90  | 100,00% | 6  | 6  | 8  | 0,15% | 22,40% |
| Cytochrome o ubiquinol oxidase subunit I | sp P0ABJ3 CYOC_ECOLI  | 22.623,20  | 96,30%  | 1  | 2  | 3  | 0,06% | 5,39%  |
| ATP synthase C chain (EC 3.6.3.14) (Lipi | sp P68699 ATPL_ECOLI  | 8.256,70   | 99,80%  | 2  | 2  | 4  | 0,07% | 20,30% |
| 2,3,4,5-tetrahydropyridine-2,6-dicarboxy | sp P0A9D8 DAPD_ECOLI  | 29.891,60  | 100,00% | 5  | 5  | 7  | 0,13% | 18,60% |
| Adenylosuccinate synthetase (EC 6.3.4.4) | sp P0A7D4 PURA_ECOLI  | 47.214,50  | 100,00% | 9  | 9  | 10 | 0,18% | 22,30% |
| GTP pyrophosphokinase (EC 2.7.6.5) (ATP: | sp P0AG20 RELA_ECOLI  | 83.876,30  | 99,70%  | 1  | 1  | 1  | 0,02% | 1,88%  |
| 2-dehydro-3-deoxyphosphoconate aldolas   | sp P0A715 KDSA_ECOLI  | 30.832,90  | 98,30%  | 2  | 2  | 2  | 0,04% | 5,99%  |
| Alpha-galactosidase (EC 3.2.1.22) (Melib | sp P06720 AGAL_ECOLI  | 50.657,80  | 99,90%  | 2  | 3  | 3  | 0,06% | 4,21%  |
| Cell division protein ftsZ.              | sp P0A9A6 FTSZ_ECOLI  | 40.324,00  | 100,00% | 12 | 13 | 14 | 0,26% | 38,90% |
| Glucosamine-fructose-6-phosphate aminot  | sp P17169 GLMS_ECOLI  | 66.764,50  | 100,00% | 5  | 5  | 7  | 0,13% | 8,88%  |
| KHG/KDPG aldolase [Includes: 4-hydroxy-2 | sp P0A955 ALKH_ECOLI  | 22.284,30  | 100,00% | 2  | 2  | 2  | 0,04% | 15,00% |
| Tagatose-1,6-bisphosphate aldolase gatY  | sp P37192 GATY_ECOLI  | 30.811,50  | 100,00% | 6  | 7  | 16 | 0,29% | 22,20% |
| Fructose-bisphosphate aldolase class I ( | sp P0A991 ALF1_ECOLI  | 37.978,90  | 96,30%  | 1  | 1  | 1  | 0,02% | 6,02%  |
| Probable ABC transporter ATP-binding pro | sp P0A9V1 YHBG_ECOLI  | 26.670,30  | 100,00% | 3  | 3  | 4  | 0,07% | 16,20% |
| Purine nucleoside phosphorylase deoD-ty  | sp P0ABP8 DEOD_ECOLI  | 25.819,30  | 100,00% | 4  | 4  | 7  | 0,13% | 18,50% |
| 2-oxoglutarate dehydrogenase E1 componen | sp P0AFG3 ODO1_ECOLI  | 105.061,90 | 100,00% | 3  | 3  | 3  | 0,06% | 3,32%  |
| Galactoside transport system permease pr | sp P23200 MGLC_ECOLI  | 35.551,90  | 96,30%  | 1  | 1  | 2  | 0,04% | 3,87%  |
| Putative xanthine dehydrogenase yagR, mo | sp P77489 YAGR_ECOLI  | 78.089,00  | 95,30%  | 1  | 1  | 2  | 0,04% | 1,23%  |
| Cystine-binding periplasmic              | sp P0AEM9 FLIY_ECOLI  | 29.039,90  | 100,00% | 3  | 3  | 3  | 0,06% | 10,20% |

|                                           |                       |           |         |    |    |     |       |        |
|-------------------------------------------|-----------------------|-----------|---------|----|----|-----|-------|--------|
| protein prec                              |                       | 0         |         |    |    |     |       |        |
| Phosphoenolpyruvate carboxylase (EC 4.1.  | sp P00864 CAPP_ECOLI  | 99.066,00 | 100,00% | 12 | 12 | 14  | 0,26% | 13,70% |
| Acetate kinase (EC 2.7.2.1) (Acetokinase) | sp P0A6A3 ACKA_ECOLI  | 43.291,50 | 96,30%  | 1  | 1  | 1   | 0,02% | 3,75%  |
| Protein csID.                             | sp P76621 CSID_ECOLI  | 37.360,80 | 100,00% | 4  | 4  | 5   | 0,09% | 16,00% |
| Hypothetical protein yicH.                | sp P31433 YICH_ECOLI  | 62.274,00 | 96,30%  | 1  | 1  | 1   | 0,02% | 1,76%  |
| Protein ygfZ.                             | sp P0ADE8 YGFZ_ECOLI  | 35.963,60 | 96,10%  | 1  | 1  | 1   | 0,02% | 3,38%  |
| Biotin carboxylase (EC 6.3.4.14) (A subu  | sp P24182 ACCC_ECOLI  | 49.321,90 | 100,00% | 6  | 6  | 10  | 0,18% | 14,90% |
| 10 kDa chaperonin (Protein Cpn10) (groES  | sp P0A6F9 CH10_ECOLI  | 10.387,00 | 100,00% | 2  | 2  | 2   | 0,04% | 24,70% |
| Hypothetical adenine-specific methylase   | sp P39199 YFCB_ECOLI  | 35.002,40 | 100,00% | 2  | 2  | 2   | 0,04% | 6,13%  |
| Phosphoheptose isomerase (EC 5.3.1.-) (S  | sp P63224 GMHA_ECOLI  | 20.815,40 | 100,00% | 2  | 2  | 2   | 0,04% | 10,40% |
| 2,3-bisphosphoglycerate-independent phos  | sp P37689 GPMI_ECOLI  | 56.194,50 | 96,30%  | 1  | 1  | 1   | 0,02% | 2,72%  |
| Probable glutamate/gamma-aminobutyrate a  | sp P63235 GADC_ECOLI  | 55.078,90 | 100,00% | 3  | 3  | 4   | 0,07% | 7,05%  |
| Tryptophanase (EC 4.1.99.1) (L-tryptopha  | sp P0A853 TNAE_ECOLI  | 52.774,80 | 100,00% | 26 | 45 | 141 | 2,59% | 56,50% |
| Aspartyl-tRNA synthetase (EC 6.1.1.12) (  | sp P21889 SYD_ECOLI   | 65.915,50 | 100,00% | 8  | 8  | 10  | 0,18% | 15,10% |
| Formate acetyltransferase 1 (EC 2.3.1.54  | sp P09373 PFLB_ECOLI  | 85.229,10 | 100,00% | 18 | 24 | 28  | 0,51% | 32,10% |
| Hypothetical lipoprotein yedD precursor.  | sp P31063 YEDD_ECOLI  | 14.983,50 | 100,00% | 3  | 4  | 5   | 0,09% | 31,40% |
| CTP synthase (EC 6.3.4.2) (UTP→ammonia    | sp P0A7E5 PYRG_ECOLI  | 60.243,40 | 100,00% | 2  | 2  | 2   | 0,04% | 4,41%  |
| 6-phosphofructokinase isozyme I (EC 2.7.  | sp P0A796 K6PF1_ECOLI | 34.843,00 | 100,00% | 2  | 3  | 3   | 0,06% | 8,44%  |
| 50S ribosomal protein L5.                 | sp P62399 RL5_ECOLI   | 20.171,50 | 100,00% | 4  | 5  | 5   | 0,09% | 25,30% |
| 50S ribosomal protein L6.                 | sp P0AG55 RL6_ECOLI   | 18.772,30 | 95,30%  | 1  | 1  | 1   | 0,02% | 6,82%  |
| Glucosamine-6-phosphate deaminase (EC 3.  | sp P0A759 NAGB_ECOLI  | 29.774,40 | 100,00% | 2  | 2  | 2   | 0,04% | 8,65%  |
| Phenylalanyl-tRNA synthetase alpha chain  | sp P08312 SYFA_ECOLI  | 36.832,50 | 99,30%  | 1  | 1  | 1   | 0,02% | 3,67%  |
| Protein hflC (EC 3.4.-.-).                | sp P0ABC3 HFLC_ECOLI  | 37.650,90 | 94,90%  | 1  | 1  | 1   | 0,02% | 5,09%  |
| Putative metalloprotease yggG (EC 3.4.24  | sp P25894 YGGG_ECOLI  | 26.842,40 | 100,00% | 2  | 2  | 2   | 0,04% | 10,70% |
| Glyceraldehyde-3-phosphate dehydrogenase  | sp P0A9B2 G3P1_ECOLI  | 35.401,40 | 100,00% | 17 | 23 | 38  | 0,70% | 53,60% |
| Biopolymer transport exbB protein.        | sp P0ABU7 EXBB_ECOLI  | 26.287,80 | 99,80%  | 1  | 1  | 1   | 0,02% | 6,15%  |
| Protein-export membrane protein secF.     | sp P0AG93 SECF_ECOLI  | 35.383,50 | 96,30%  | 1  | 1  | 1   | 0,02% | 4,02%  |
| UDP-glucose 4-epimerase (EC 5.1.3.2) (Ga  | sp P09147 GALE_ECOLI  | 37.265,10 | 96,30%  | 1  | 1  | 1   | 0,02% | 5,62%  |
| Cysteine synthase B (EC 2.5.1.47) (O-ace  | sp P16703 CYSM_ECOLI  | 32.664,60 | 99,60%  | 1  | 1  | 1   | 0,02% | 4,29%  |
| Enoyl-[acyl-carrier-protein] reductase [  | sp P0AEK4 FABI_ECOLI  | 27.733,40 | 100,00% | 2  | 2  | 2   | 0,04% | 8,81%  |
| Acyl-CoA thioester hydrolase ybgC precu   | sp P46130 YBHC_ECOLI  | 46.081,90 | 100,00% | 6  | 6  | 8   | 0,15% | 18,00% |
| Chaperone protein htpG (Heat shock prote  | sp P0A6Z3 HTPG_ECOLI  | 71.425,00 | 100,00% | 3  | 3  | 3   | 0,06% | 6,25%  |
| Hypothetical protein yeaG.                | sp P0ACY3 YEAG_ECOLI  | 74.483,00 | 99,90%  | 1  | 1  | 1   | 0,02% | 2,02%  |
| Glycogen phosphorylase (EC 2.4.1.1).      | sp P0AC86 PHSG_ECOLI  | 93.175,30 | 100,00% | 4  | 4  | 4   | 0,07% | 6,01%  |
| Alkyl hydroperoxide reductase subunit C   | sp P0AE08 AHPC_ECOLI  | 20.630,70 | 100,00% | 7  | 11 | 16  | 0,29% | 43,00% |

|                                          |                                                    |            |         |    |    |    |       |        |
|------------------------------------------|----------------------------------------------------|------------|---------|----|----|----|-------|--------|
| Protease degQ precursor (EC 3.4.21.-).   | sp P39099 DEGQ_ECOLI                               | 47.207,10  | 95,30%  | 1  | 1  | 1  | 0,02% | 2,42%  |
| Aminopeptidase N (EC 3.4.11.2) (Alpha-am | sp P04825 AMPN_ECOLI                               | 98.790,60  | 100,00% | 4  | 4  | 5  | 0,09% | 5,18%  |
| Colicin I receptor precursor.            | sp P17315 CIRA_ECOLI                               | 73.896,60  | 96,30%  | 1  | 1  | 1  | 0,02% | 1,81%  |
| Alkyl hydroperoxide reductase subunit F  | sp P35340 AHPF_ECOLI                               | 56.178,20  | 100,00% | 2  | 2  | 3  | 0,06% | 4,41%  |
| Glycerol-3-phosphate transporter (G-3-P  | sp P08194 GLPT_ECOLI                               | 50.312,50  | 100,00% | 2  | 2  | 2  | 0,04% | 5,09%  |
| Chain length determinant protein (Polysa | sp P76372 WZZB_ECOLI                               | 36.455,60  | 100,00% | 4  | 4  | 4  | 0,07% | 15,30% |
| Isocitrate dehydrogenase [NADP] (EC 1.1. | sp P08200 IDH_ECOLI                                | 45.758,00  | 100,00% | 4  | 4  | 6  | 0,11% | 13,50% |
| Probable protease htpX (EC 3.4.24.-) (He | sp P23894 HTPX_ECOLI                               | 31.924,10  | 96,30%  | 1  | 1  | 1  | 0,02% | 3,75%  |
| 50S ribosomal protein L18.               | sp P0C018 RL18_ECOLI                               | 12.769,70  | 95,50%  | 1  | 1  | 1  | 0,02% | 7,69%  |
| Transketolase 1 (EC 2.2.1.1) (TK 1).     | sp P27302 TKT1_ECOLI                               | 72.213,00  | 100,00% | 10 | 11 | 14 | 0,26% | 17,60% |
| Outer membrane lipoprotein slyB precurso | sp P0A905 SLYB_ECOLI                               | 15.600,60  | 100,00% | 4  | 6  | 9  | 0,17% | 38,70% |
| 50S ribosomal protein L17.               | sp P0AG44 RL17_ECOLI                               | 14.365,20  | 100,00% | 3  | 3  | 4  | 0,07% | 26,00% |
| Xaa-Pro dipeptidase (EC 3.4.13.9) (X-Pro | sp P21165 PEPQ_ECOLI                               | 50.177,30  | 99,00%  | 1  | 1  | 1  | 0,02% | 2,26%  |
| Pyruvate dehydrogenase E1 component (EC  | sp P0AFG8 ODP1_ECOLI                               | 99.540,00  | 100,00% | 6  | 6  | 6  | 0,11% | 7,56%  |
| Phosphoenolpyruvate-protein phosphotrans | sp P37177 PT1P_ECOLI                               | 83.718,50  | 100,00% | 3  | 3  | 3  | 0,06% | 5,21%  |
| Ribose transport ATP-binding protein rbs | sp P04983 RBSA_ECOLI                               | 55.043,30  | 99,90%  | 1  | 1  | 1  | 0,02% | 2,59%  |
| Rare lipoprotein A precursor.            | sp P10100 RLPA_ECOLI                               | 37.527,60  | 100,00% | 2  | 2  | 2  | 0,04% | 6,91%  |
| Magnesium transporting ATPase, P-type 1  | sp P0ABB8 ATMA_ECOLI                               | 99.468,80  | 100,00% | 3  | 3  | 3  | 0,06% | 5,23%  |
| Hypothetical protein yibN.               | sp P0AG27 YIBN_ECOLI                               | 15.596,20  | 100,00% | 2  | 2  | 2  | 0,04% | 17,50% |
| Transcription elongation protein nusA (N | sp P0AFF6 NUSA_ECOLI                               | 54.871,40  | 100,00% | 2  | 2  | 2  | 0,04% | 5,05%  |
| 2-amino-3-ketobutyrate coenzyme A ligase | sp P0AB77 KBL_ECOLI                                | 43.117,70  | 100,00% | 7  | 7  | 7  | 0,13% | 20,40% |
| NADH-quinone oxidoreductase chain B (EC  | sp P0AFC7 NUOB_ECOLI                               | 25.055,60  | 100,00% | 4  | 4  | 6  | 0,11% | 16,80% |
| Aldehyde dehydrogenase B (EC 1.2.1.-).   | sp P37685 ALDB_ECOLI                               | 56.307,40  | 100,00% | 7  | 9  | 10 | 0,18% | 18,90% |
| Isoleucyl-tRNA synthetase (EC 6.1.1.5) ( | sp P00956 SYI_ECOLI                                | 104.167,10 | 100,00% | 7  | 7  | 8  | 0,15% | 7,36%  |
| Lipoprotein yfgL precursor.              | sp P77774 YFGL_ECOLI                               | 41.886,90  | 100,00% | 4  | 4  | 4  | 0,07% | 13,00% |
| ADP-L-glycero-D-manno-heptose-6-epimeras | sp P67910 HLDD_ECOLI                               | 34.894,30  | 100,00% | 8  | 8  | 9  | 0,17% | 29,00% |
| Transketolase 2 (EC 2.2.1.1) (TK 2).     | sp P33570 TKT2_ECOLI                               | 73.044,10  | 99,70%  | 2  | 2  | 2  | 0,04% | 2,70%  |
| Inner membrane protein yjgQ.             | sp P0ADC6 YJGQ_ECOLI                               | 39.620,10  | 100,00% | 2  | 2  | 2  | 0,04% | 6,39%  |
| Inner membrane protein oxaA.             | sp P25714 OXAA_ECOLI                               | 61.528,00  | 100,00% | 2  | 2  | 2  | 0,04% | 4,56%  |
| EIImtI                                   | 6H-C384S-W42,6H-W42,EII-F97W,sp P00550 PTM3C_ECOLI | 67.857,70  | 100,00% | 8  | 8  | 9  | 0,17% | 15,00% |
| 30S ribosomal protein S1.                | sp P0AG67 RS1_ECOLI                                | 61.157,40  | 100,00% | 16 | 23 | 30 | 0,55% | 31,40% |
| Na(+)/H(+) antiporter 2 (Sodium/proton a | sp P0AFA7 NHAB_ECOLI                               | 56.730,50  | 96,30%  | 1  | 1  | 1  | 0,02% | 2,14%  |
| Elongation factor G (EF-G).              | sp P0A6M8 EFG_ECOLI                                | 77.450,80  | 100,00% | 22 | 30 | 47 | 0,86% | 43,50% |
| Mannose permease IIC component (PTS syst | sp P69801 PTNC_ECOLI                               | 27.636,40  | 100,00% | 2  | 3  | 6  | 0,11% | 11,70% |

|                                          |                      |            |         |    |    |    |       |        |
|------------------------------------------|----------------------|------------|---------|----|----|----|-------|--------|
| Hypothetical zinc-type alcohol dehydroge | sp P27250 YJGB_ECOLI | 36.501,80  | 100,00% | 2  | 2  | 2  | 0,04% | 7,37%  |
| 30S ribosomal protein S16.               | sp P0A7T3 RS16_ECOLI | 9.190,60   | 99,70%  | 1  | 1  | 1  | 0,02% | 13,40% |
| Protein-export membrane protein secD.    | sp P0AG90 SECD_ECOLI | 66.634,50  | 100,00% | 14 | 14 | 19 | 0,35% | 28,00% |
| Spermidine/putrescine import ATP-binding | sp P69874 POTA_ECOLI | 43.028,40  | 100,00% | 3  | 3  | 3  | 0,06% | 9,52%  |
| Protein ydgH precursor.                  | sp P76177 YDGH_ECOLI | 33.903,30  | 100,00% | 2  | 2  | 2  | 0,04% | 8,60%  |
| GTP cyclohydrolase I (EC 3.5.4.16) (GTP- | sp P0A6T5 GCH1_ECOLI | 24.699,80  | 100,00% | 3  | 3  | 3  | 0,06% | 15,80% |
| Oligopeptidase A (EC 3.4.24.70).         | sp P27298 OPDA_ECOLI | 77.169,50  | 99,50%  | 2  | 2  | 2  | 0,04% | 3,53%  |
| Organic solvent tolerance protein precur | sp P31554 OSTA_ECOLI | 89.672,80  | 100,00% | 12 | 13 | 16 | 0,29% | 17,10% |
| Aspartate aminotransferase (EC 2.6.1.1)  | sp P00509 AAT_ECOLI  | 43.574,10  | 100,00% | 10 | 11 | 13 | 0,24% | 28,00% |
| Superoxide dismutase [Mn] (EC 1.15.1.1)  | sp P00448 SODM_ECOLI | 22.966,60  | 100,00% | 4  | 4  | 6  | 0,11% | 20,00% |
| Transport ATP-binding protein cydC.      | sp P23886 CYDC_ECOLI | 62.922,80  | 99,90%  | 1  | 1  | 1  | 0,02% | 2,62%  |
| Cell division protein ftsY.              | sp P10121 FTSY_ECOLI | 54.512,50  | 100,00% | 2  | 2  | 2  | 0,04% | 4,23%  |
| Alanyl-tRNA synthetase (EC 6.1.1.7) (Ala | sp P00957 SYA_ECOLI  | 96.033,60  | 100,00% | 31 | 39 | 55 | 1,01% | 43,40% |
| Succinyl-CoA synthetase alpha chain (EC  | sp P0AGE9 SUCD_ECOLI | 29.646,60  | 100,00% | 11 | 14 | 21 | 0,39% | 46,90% |
| Hypothetical protein ycfM.               | sp P0AB38 YCFM_ECOLI | 22.515,20  | 100,00% | 4  | 4  | 5  | 0,09% | 29,60% |
| Adenylosuccinate lyase (EC 4.3.2.2) (Ade | sp P0AB89 PUR8_ECOLI | 51.544,10  | 100,00% | 8  | 8  | 10 | 0,18% | 19,30% |
| Hypothetical protein ydbA.               | sp P33666 YDBA_ECOLI | 205.947,30 | 98,00%  | 1  | 1  | 1  | 0,02% | 0,70%  |
| Ribokinase (EC 2.7.1.15).                | sp P0A9J6 RBSK_ECOLI | 32.290,60  | 100,00% | 3  | 3  | 3  | 0,06% | 12,00% |
| Xaa-Pro aminopeptidase (EC 3.4.11.9) (X- | sp P15034 AMPP_ECOLI | 49.684,60  | 100,00% | 6  | 6  | 6  | 0,11% | 14,10% |
| Glucose-6-phosphate isomerase (EC 5.3.1. | sp P0A6T1 G6PI_ECOLI | 61.531,40  | 100,00% | 9  | 9  | 11 | 0,20% | 20,20% |
| Rare lipoprotein B precursor.            | sp P0ADC1 RLPB_ECOLI | 21.357,30  | 100,00% | 5  | 6  | 9  | 0,17% | 31,60% |
| L-threonine 3-dehydrogenase (EC 1.1.1.10 | sp P07913 TDH_ECOLI  | 37.239,60  | 100,00% | 3  | 3  | 3  | 0,06% | 12,30% |
| Protein-export protein secB.             | sp P0AG86 SECB_ECOLI | 17.277,20  | 99,80%  | 1  | 1  | 1  | 0,02% | 9,68%  |
| Hypothetical lipoprotein ydcl precursor. | sp P64451 YDCL_ECOLI | 24.427,30  | 100,00% | 9  | 11 | 16 | 0,29% | 54,50% |
| Fumarate reductase flavoprotein subunit  | sp P00363 FRDA_ECOLI | 65.840,40  | 100,00% | 5  | 5  | 5  | 0,09% | 8,82%  |
| Outer membrane protein C precursor (Pori | sp P06996 OMPC_ECOLI | 40.369,00  | 100,00% | 4  | 4  | 4  | 0,07% | 13,40% |
| Elongation factor Ts (EF-Ts).            | sp P0A6P1 EFTS_ECOLI | 30.291,60  | 100,00% | 11 | 12 | 14 | 0,26% | 36,90% |
| NAD(P) transhydrogenase subunit beta (EC | sp P0AB67 PNTB_ECOLI | 48.724,00  | 100,00% | 8  | 13 | 16 | 0,29% | 22,90% |
| Superoxide dismutase [Fe] (EC 1.15.1.1). | sp P0AGD3 SODF_ECOLI | 21.135,00  | 100,00% | 4  | 4  | 7  | 0,13% | 25,50% |
| Stringent starvation protein A.          | sp P0ACA3 SSPA_ECOLI | 24.174,60  | 100,00% | 2  | 2  | 2  | 0,04% | 11,80% |
| Spermidine/putrescine-binding periplasmi | sp P0AFK9 POTD_ECOLI | 38.868,90  | 100,00% | 2  | 2  | 2  | 0,04% | 7,47%  |
| Leucyl-tRNA synthetase (EC 6.1.1.4) (Leu | sp P07813 SYL_ECOLI  | 97.234,30  | 100,00% | 2  | 2  | 2  | 0,04% | 2,79%  |
| 2,3-bisphosphoglycerate-dependent phosph | sp P62707 GPMA_ECOLI | 28.426,10  | 100,00% | 4  | 5  | 7  | 0,13% | 18,10% |
| Putative HTH-type transcriptional regula | sp P77634 YBCM_ECOLI | 30.842,00  | 99,10%  | 1  | 1  | 1  | 0,02% | 4,15%  |
| 50S ribosomal protein L10 (50S ribosomal | sp P0A7J3 RL10_ECOLI | 17.580,60  | 100,00% | 8  | 9  | 12 | 0,22% | 53,70% |



|                                          |                      |           |         |    |    |    |       |        |
|------------------------------------------|----------------------|-----------|---------|----|----|----|-------|--------|
| 30S ribosomal protein S4.                | sp P0A7V8 RS4_ECOLI  | 23.338,50 | 100,00% | 3  | 3  | 4  | 0,07% | 20,00% |
| Peroxidase/catalase HPI (EC 1.11.1.6) (C | sp P13029 CATA_ECOLI | 80.025,80 | 100,00% | 22 | 29 | 45 | 0,83% | 32,90% |
| Ribose transport system permease protein | sp P0AGI1 RBSC_ECOLI | 33.452,90 | 100,00% | 2  | 2  | 3  | 0,06% | 6,54%  |
| Asparaginyl-tRNA synthetase (EC 6.1.1.22 | sp P0A8M0 SYN_ECOLI  | 52.439,10 | 100,00% | 8  | 8  | 8  | 0,15% | 20,90% |
| Glucokinase (EC 2.7.1.2) (Glucose kinase | sp P0A6V8 GLK_ECOLI  | 34.723,90 | 100,00% | 3  | 3  | 3  | 0,06% | 10,90% |
| Ubiquinol oxidase polypeptide II precurs | sp P0ABJ1 CYOA_ECOLI | 34.912,30 | 100,00% | 6  | 9  | 21 | 0,39% | 26,30% |
| Cold shock-like protein cspC (CSP-C).    | sp P0A9Y6 CSPC_ECOLI | 7.271,10  | 100,00% | 2  | 2  | 3  | 0,06% | 42,60% |
| S-adenosylmethionine synthetase (EC 2.5. | sp P0A817 METK_ECOLI | 41.820,90 | 100,00% | 2  | 2  | 2  | 0,04% | 7,83%  |
| Maltoporin precursor (Maltose-inducible  | sp P02943 LAMB_ECOLI | 49.912,80 | 100,00% | 5  | 7  | 10 | 0,18% | 14,80% |
| 3-oxoacyl-[acyl-carrier-protein] synthas | sp P0A953 FABB_ECOLI | 42.613,40 | 100,00% | 4  | 5  | 6  | 0,11% | 10,30% |
| Peptidyl-prolyl cis-trans isomerase D (E | sp P0ADY1 PPID_ECOLI | 68.151,40 | 100,00% | 13 | 13 | 15 | 0,28% | 27,60% |
| NADH dehydrogenase (EC 1.6.99.3).        | sp P00393 DHNA_ECOLI | 47.228,80 | 99,30%  | 1  | 1  | 1  | 0,02% | 2,54%  |
| Hypothetical protein yneA precursor.     | sp P76142 YNEA_ECOLI | 36.685,00 | 100,00% | 3  | 3  | 3  | 0,06% | 9,71%  |
| 30S ribosomal protein S2.                | sp P0A7V0 RS2_ECOLI  | 26.613,10 | 100,00% | 5  | 5  | 5  | 0,09% | 24,20% |
| Hypothetical lipoprotein yifL precursor. | sp P0ADN6 YIFL_ECOLI | 7.177,40  | 96,30%  | 1  | 1  | 2  | 0,04% | 34,30% |
| Phospho-N-acetylmuramoyl-pentapeptide-tr | sp P0A6W3 MRAY_ECOLI | 39.875,60 | 99,70%  | 1  | 1  | 1  | 0,02% | 2,22%  |
| UPF0304 protein yfbU.                    | sp P0A8W8 YFBU_ECOLI | 19.536,50 | 100,00% | 2  | 2  | 2  | 0,04% | 17,10% |
| UPF0169 lipoprotein yfiO precursor.      | sp P0AC02 YFIO_ECOLI | 27.830,30 | 100,00% | 4  | 4  | 4  | 0,07% | 20,40% |
| Phosphocarrier protein HPr (Histidine-co | sp P0AA04 PTHP_ECOLI | 9.119,20  | 99,90%  | 1  | 1  | 1  | 0,02% | 15,30% |
| Phenylalanyl-tRNA synthetase beta chain  | sp P07395 SYFB_ECOLI | 87.378,60 | 100,00% | 3  | 3  | 3  | 0,06% | 4,91%  |
| Anthranilate synthase component I (EC 4. | sp P00895 TRPE_ECOLI | 57.495,80 | 100,00% | 3  | 3  | 3  | 0,06% | 6,54%  |
| Pyruvate dehydrogenase [cytochrome] (EC  | sp P07003 POXB_ECOLI | 62.012,00 | 100,00% | 3  | 3  | 3  | 0,06% | 6,64%  |
| Low affinity tryptophan permease.        | sp P23173 TNAB_ECOLI | 45.213,70 | 100,00% | 2  | 2  | 3  | 0,06% | 5,54%  |
| D-3-phosphoglycerate dehydrogenase (EC 1 | sp P0A9T0 SERA_ECOLI | 44.045,90 | 100,00% | 2  | 2  | 2  | 0,04% | 6,36%  |
| Succinate dehydrogenase iron-sulfur prot | sp P07014 DHSB_ECOLI | 26.771,00 | 100,00% | 2  | 2  | 2  | 0,04% | 10,10% |
| Sec-independent protein translocase prot | sp P69428 TATA_ECOLI | 9.664,50  | 99,90%  | 1  | 1  | 1  | 0,02% | 14,60% |
| Entericidin B precursor.                 | sp P0ADB7 ECNB_ECOLI | 4.809,50  | 96,30%  | 1  | 2  | 4  | 0,07% | 39,60% |
| Uridine phosphorylase (EC 2.4.2.3) (UrdP | sp P12758 UDP_ECOLI  | 27.027,50 | 100,00% | 6  | 8  | 10 | 0,18% | 27,80% |
| NAD(P) transhydrogenase subunit alpha (E | sp P07001 PNTA_ECOLI | 54.623,70 | 100,00% | 9  | 14 | 22 | 0,40% | 23,70% |
| Probable formate transporter 1 (Formate  | sp P0AC23 FOCA_ECOLI | 30.991,40 | 100,00% | 3  | 4  | 4  | 0,07% | 9,12%  |
| Nucleoside permease nupC (Nucleoside-tra | sp P0AFF2 NUPC_ECOLI | 43.477,70 | 100,00% | 2  | 2  | 3  | 0,06% | 5,00%  |
| Peptidoglycan-associated lipoprotein pre | sp P0A912 PAL_ECOLI  | 18.824,50 | 100,00% | 4  | 4  | 7  | 0,13% | 29,50% |
| Putative betaine aldehyde dehydrogenase  | sp P77674 YDCW_ECOLI | 50.829,80 | 100,00% | 7  | 9  | 11 | 0,20% | 21,30% |
| Protein dcrB precursor.                  | sp P0AEE1 DCRB_ECOLI | 19.787,70 | 100,00% | 2  | 2  | 2  | 0,04% | 16,20% |
| Lysyl-tRNA synthetase, heat inducible (E | sp P0A8N5 SYK2_ECOLI | 57.697,30 | 100,00% | 2  | 2  | 2  | 0,04% | 9,13%  |

|                                          |                       |           |         |    |    |    |       |        |
|------------------------------------------|-----------------------|-----------|---------|----|----|----|-------|--------|
| D-methionine-binding lipoprotein metQ pr | sp P28635 METQ_ECOLI  | 29.431,90 | 100,00% | 6  | 6  | 6  | 0,11% | 30,60% |
| Transaldolase A (EC 2.2.1.2).            | sp P0A867 TALA_ECOLI  | 35.659,50 | 99,50%  | 1  | 1  | 1  | 0,02% | 5,06%  |
| Glutathione reductase (EC 1.8.1.7) (GR)  | sp P06715 GSHR_ECOLI  | 48.772,60 | 100,00% | 2  | 2  | 2  | 0,04% | 4,89%  |
| Putative transport protein yidE.         | sp P60872 YIDE_ECOLI  | 58.941,10 | 99,90%  | 1  | 1  | 1  | 0,02% | 1,99%  |
| Glycerol kinase (EC 2.7.1.30) (ATP:glyce | sp P0A6F3 GLPK_ECOLI  | 56.100,10 | 100,00% | 5  | 5  | 6  | 0,11% | 13,00% |
| Elongation factor Tu (EF-Tu) (P-43).     | sp P0A6N1 EFTU_ECOLI  | 43.182,60 | 100,00% | 21 | 29 | 56 | 1,03% | 61,10% |
| Aspartate ammonia-lyase (EC 4.3.1.1) (As | sp P0AC38 ASPA_ECOLI  | 52.356,30 | 100,00% | 16 | 20 | 31 | 0,57% | 39,30% |
| Hypothetical UPF0070 protein yfgM.       | sp P76576 YFGM_ECOLI  | 22.176,40 | 100,00% | 2  | 2  | 2  | 0,04% | 21,40% |
| Inner membrane protein yccF.             | sp P0AB12 YCCF_ECOLI  | 16.275,90 | 100,00% | 2  | 2  | 2  | 0,04% | 14,90% |
| High affinity ribose transport protein r | sp P04982 RBSD_ECOLI  | 15.292,20 | 100,00% | 3  | 3  | 4  | 0,07% | 24,50% |
| Glycyl-tRNA synthetase alpha chain (EC 6 | sp P00960 SYGA_ECOLI  | 34.774,90 | 100,00% | 4  | 5  | 7  | 0,13% | 21,50% |
| 3-oxoacyl-[acyl-carrier-protein] reducta | sp P0AEK2 FABG_ECOLI  | 25.561,00 | 100,00% | 7  | 12 | 17 | 0,31% | 43,00% |
| Delta-aminolevulinic acid dehydratase (E | sp P0ACB2 HEM2_ECOLI  | 35.494,70 | 100,00% | 6  | 6  | 8  | 0,15% | 21,70% |
| Phosphoglycerate kinase (EC 2.7.2.3).    | sp P0A799 PGK_ECOLI   | 40.988,00 | 100,00% | 8  | 9  | 11 | 0,20% | 23,30% |
| NADH-quinone oxidoreductase chain F (EC  | sp P31979 NUOF_ECOLI  | 49.294,50 | 100,00% | 7  | 7  | 7  | 0,13% | 20,90% |
| Fructose-bisphosphate aldolase class II  | sp P0AB71 ALF_ECOLI   | 39.016,10 | 100,00% | 8  | 11 | 15 | 0,28% | 29,90% |
| UTP-glucose-1-phosphate uridylyltransfe  | sp P0AAB6 GALF_ECOLI  | 32.830,10 | 96,30%  | 1  | 1  | 2  | 0,04% | 4,04%  |
| MltA-interacting protein precursor.      | sp P0A908 MIPA_ECOLI  | 27.831,90 | 96,30%  | 1  | 1  | 2  | 0,04% | 5,24%  |
| Aconitate hydratase 1 (EC 4.2.1.3) (Citr | sp P25516 ACON1_ECOLI | 97.517,60 | 100,00% | 3  | 3  | 3  | 0,06% | 3,03%  |
| Protein recA (Recombinase A).            | sp P0A7G6 RECA_ECOLI  | 37.843,50 | 100,00% | 5  | 5  | 5  | 0,09% | 19,60% |
| ATP-dependent protease hslV (EC 3.4.25.- | sp P0A7B8 HSLV_ECOLI  | 18.962,10 | 100,00% | 2  | 2  | 2  | 0,04% | 10,30% |
| Hypothetical UPF0325 protein yaeH.       | sp P62768 YAEH_ECOLI  | 15.097,00 | 99,90%  | 2  | 2  | 2  | 0,04% | 18,80% |
| Long-chain fatty acid transport protein  | sp P10384 FADL_ECOLI  | 48.773,40 | 96,30%  | 1  | 1  | 1  | 0,02% | 2,68%  |
| ATP synthase B chain (EC 3.6.3.14).      | sp P0ABA0 ATPF_ECOLI  | 17.264,50 | 100,00% | 9  | 11 | 19 | 0,35% | 46,80% |
| Outer membrane protein X precursor.      | sp P0A917 OMPX_ECOLI  | 18.603,00 | 98,80%  | 2  | 2  | 2  | 0,04% | 13,50% |
| ATP-dependent Clp protease proteolytic s | sp P0A6G7 CLPP_ECOLI  | 23.187,30 | 100,00% | 2  | 3  | 4  | 0,07% | 14,50% |
| Hypothetical protein yram.               | sp P45464 YRAM_ECOLI  | 72.825,80 | 100,00% | 5  | 5  | 5  | 0,09% | 7,67%  |
| PTS system mannose-specific EIIB compon  | sp P69797 PTNAB_ECOLI | 34.916,20 | 100,00% | 14 | 23 | 38 | 0,70% | 42,50% |
| ATP-dependent hsl protease ATP-binding s | sp P0A6H5 HSLU_ECOLI  | 49.595,20 | 99,60%  | 2  | 2  | 2  | 0,04% | 5,42%  |
| Cysteine synthase A (EC 2.5.1.47) (O-ace | sp P0ABK5 CYSK_ECOLI  | 34.359,70 | 100,00% | 10 | 11 | 16 | 0,29% | 38,80% |
| Catalase HPII (EC 1.11.1.6) (Hydroxypero | sp P21179 CATE_ECOLI  | 84.165,10 | 100,00% | 22 | 27 | 38 | 0,70% | 30,40% |
| 50S ribosomal protein L1.                | sp P0A7L0 RL1_ECOLI   | 24.598,20 | 100,00% | 6  | 7  | 9  | 0,17% | 33,90% |
| Thiosulfate-binding protein precursor.   | sp P16700 CYSP_ECOLI  | 37.615,40 | 100,00% | 3  | 3  | 3  | 0,06% | 9,47%  |
| Protein rcsF.                            | sp P69411 RCSF_ECOLI  | 14.163,50 | 95,90%  | 1  | 1  | 1  | 0,02% | 10,40% |
| 30S ribosomal protein S10.               | sp P0A7R5 RS10_ECOLI  | 11.735,80 | 100,00% | 2  | 2  | 2  | 0,04% | 23,30% |

|                                          |                       |            |         |    |    |    |       |        |
|------------------------------------------|-----------------------|------------|---------|----|----|----|-------|--------|
|                                          |                       | 0          |         |    |    |    |       |        |
| Triosephosphate isomerase (EC 5.3.1.1) ( | sp P0A858 TPIS_ECOLI  | 26.971,80  | 100,00% | 4  | 4  | 4  | 0,07% | 18,00% |
| ATP synthase beta chain (EC 3.6.3.14).   | sp P0ABB4 ATPB_ECOLI  | 50.194,30  | 100,00% | 5  | 5  | 5  | 0,09% | 16,30% |
| DNA gyrase subunit A (EC 5.99.1.3).      | sp P0AES4 GYRA_ECOLI  | 96.965,00  | 100,00% | 13 | 13 | 14 | 0,26% | 18,70% |
| Phosphoserine aminotransferase (EC 2.6.1 | sp P23721 SERC_ECOLI  | 39.652,90  | 100,00% | 2  | 2  | 2  | 0,04% | 7,76%  |
| Alpha-ketoglutarate permease.            | sp P0AEX3 KGTP_ECOLI  | 47.054,00  | 100,00% | 2  | 2  | 2  | 0,04% | 5,09%  |
| ATP synthase alpha chain (EC 3.6.3.14).  | sp P0ABB0 ATPA_ECOLI  | 55.223,20  | 100,00% | 10 | 11 | 11 | 0,20% | 22,40% |
| 50S ribosomal protein L9.                | sp P0A7R1 RL9_ECOLI   | 15.768,70  | 100,00% | 3  | 3  | 3  | 0,06% | 23,50% |
| PTS system trehalose-specific EIIBC comp | sp P36672 PTTBC_ECOLI | 51.082,60  | 100,00% | 5  | 6  | 9  | 0,17% | 10,40% |
| Antigen 43 precursor (AG43) (Fluffing pr | sp P39180 AG43_ECOLI  | 106.823,60 | 100,00% | 25 | 39 | 64 | 1,17% | 34,40% |
| Tail-specific protease precursor (EC 3.4 | sp P23865 PRC_ECOLI   | 76.665,70  | 100,00% | 9  | 10 | 12 | 0,22% | 13,60% |
| ABC transporter ATP-binding protein yjJK | sp P0A9W3 YJK_ECOLI   | 62.314,20  | 100,00% | 2  | 2  | 2  | 0,04% | 3,97%  |
| Branched-chain-amino-acid aminotransfera | sp P0AB80 ILVE_ECOLI  | 33.962,60  | 96,30%  | 1  | 1  | 1  | 0,02% | 5,19%  |
| Glucose-6-phosphate 1-dehydrogenase (EC  | sp P0AC53 G6PD_ECOLI  | 55.705,70  | 99,70%  | 2  | 2  | 2  | 0,04% | 4,28%  |
| Hypothetical protein yfdI.               | sp P76507 YFDI_ECOLI  | 51.487,90  | 100,00% | 1  | 2  | 3  | 0,06% | 2,71%  |
| Aldehyde dehydrogenase A (EC 1.2.1.22) ( | sp P25553 ALDA_ECOLI  | 52.142,10  | 100,00% | 15 | 20 | 39 | 0,72% | 37,00% |
| Lysine-arginine-ornithine-binding peripl | sp P09551 ARGT_ECOLI  | 27.993,10  | 95,60%  | 1  | 1  | 1  | 0,02% | 2,69%  |
| Glutamine transport system permease prot | sp P0AEQ6 GLNP_ECOLI  | 24.365,90  | 95,00%  | 1  | 1  | 1  | 0,02% | 4,11%  |
| Prolyl-tRNA synthetase (EC 6.1.1.15) (Pr | sp P16659 SYP_ECOLI   | 63.693,40  | 100,00% | 10 | 11 | 14 | 0,26% | 20,80% |
| 30S ribosomal protein S13.               | sp P0A7S9 RS13_ECOLI  | 12.968,90  | 100,00% | 2  | 2  | 2  | 0,04% | 26,50% |
| Lysyl-tRNA synthetase (EC 6.1.1.6) (Lysi | sp P0A8N3 SYK1_ECOLI  | 57.474,30  | 100,00% | 5  | 5  | 5  | 0,09% | 10,90% |
| Lipid A export ATP-binding/permease prot | sp P60752 MSBA_ECOLI  | 64.462,70  | 100,00% | 10 | 10 | 12 | 0,22% | 20,30% |
| Inner membrane protein yqjE.             | sp P64585 YQJE_ECOLI  | 15.147,60  | 100,00% | 2  | 2  | 2  | 0,04% | 13,40% |
| Maltose transport system permease protei | sp P02916 MALF_ECOLI  | 57.016,50  | 100,00% | 6  | 6  | 8  | 0,15% | 16,90% |
| Glucose-1-phosphate adenylyltransferase  | sp P0A6V1 GLGC_ECOLI  | 48.566,90  | 96,30%  | 1  | 1  | 1  | 0,02% | 2,33%  |
| D-lactate dehydrogenase (EC 1.1.1.28) (R | sp P06149 DLD_ECOLI   | 64.482,90  | 100,00% | 5  | 5  | 5  | 0,09% | 8,95%  |
| Tryptophan synthase beta chain (EC 4.2.1 | sp P0A879 TRPB_ECOLI  | 42.852,80  | 100,00% | 2  | 2  | 2  | 0,04% | 9,60%  |
| Enolase (EC 4.2.1.11) (2-phosphoglycerat | sp P0A6P9 ENO_ECOLI   | 45.525,50  | 100,00% | 11 | 14 | 25 | 0,46% | 34,60% |
| Malate synthase G (EC 2.3.3.9) (MSG).    | sp P37330 MASZ_ECOLI  | 80.358,90  | 100,00% | 11 | 11 | 13 | 0,24% | 19,30% |
| Glutamate decarboxylase beta (EC 4.1.1.1 | sp P69910 DCEB_ECOLI  | 52.669,60  | 100,00% | 18 | 26 | 51 | 0,94% | 44,00% |
| Phosphoenolpyruvate carboxykinase [ATP]  | sp P22259 PPCK_ECOLI  | 59.645,30  | 100,00% | 5  | 5  | 7  | 0,13% | 13,00% |
| UPF0076 protein yjgF.                    | sp P0AF93 YJGF_ECOLI  | 13.480,20  | 99,90%  | 2  | 2  | 2  | 0,04% | 17,30% |
| Diaminopimelate decarboxylase (EC 4.1.1. | sp P00861 DCDA_ECOLI  | 46.176,60  | 100,00% | 7  | 9  | 11 | 0,20% | 27,90% |
| 2-hydroxy-3-oxopropionate reductase (EC  | sp P0ABQ2 GARR_ECOLI  | 30.428,30  | 100,00% | 3  | 3  | 4  | 0,07% | 15,30% |
| Single-strand binding protein (SSB) (Hel | sp P0AGE0 SSB_ECOLI   | 18.843,20  | 96,30%  | 1  | 1  | 1  | 0,02% | 7,91%  |

|                                           |                      |            |         |    |    |    |       |        |
|-------------------------------------------|----------------------|------------|---------|----|----|----|-------|--------|
| Glycine dehydrogenase [decarboxylating]   | sp P33195 GCSP_ECOLI | 104.246,10 | 100,00% | 10 | 10 | 12 | 0,22% | 13,20% |
| Outer membrane protein slp precursor.     | sp P37194 SLP_ECOLI  | 20.964,10  | 100,00% | 3  | 3  | 3  | 0,06% | 20,20% |
| Phosphoenolpyruvate-protein phosphotrans  | sp P08839 PT1_ECOLI  | 63.564,30  | 100,00% | 7  | 8  | 9  | 0,17% | 13,90% |
| Glutamate decarboxylase alpha (EC 4.1.1.) | sp P69908 DCEA_ECOLI | 52.686,80  | 96,30%  | 1  | 1  | 1  | 0,02% | 44,00% |
| ATP-dependent Clp protease ATP-binding s  | sp P0A6H1 CLPX_ECOLI | 46.226,10  | 100,00% | 2  | 2  | 2  | 0,04% | 6,38%  |
| Rod shape-determining protein mreB.       | sp P0A9X4 MREB_ECOLI | 36.952,40  | 99,80%  | 1  | 1  | 1  | 0,02% | 4,03%  |
| Hypothetical GST-like protein yghU.       | sp Q46845 YGHU_ECOLI | 32.392,20  | 100,00% | 2  | 2  | 2  | 0,04% | 8,68%  |
| NADP-specific glutamate dehydrogenase (E  | sp P00370 DHE4_ECOLI | 48.581,20  | 100,00% | 12 | 15 | 18 | 0,33% | 36,00% |
| Small protein A precursor.                | sp P0A937 SMPA_ECOLI | 12.302,00  | 100,00% | 2  | 2  | 2  | 0,04% | 32,70% |
| Protein grpE (HSP-70 cofactor) (Heat sho  | sp P09372 GRPE_ECOLI | 21.797,80  | 96,30%  | 1  | 1  | 1  | 0,02% | 7,11%  |
| Osmotically inducible lipoprotein E prec  | sp P0ADB1 OSME_ECOLI | 12.020,50  | 100,00% | 5  | 9  | 12 | 0,22% | 37,50% |
| Protein-export membrane protein secG (Pr  | sp P0AG99 SECG_ECOLI | 11.365,80  | 100,00% | 2  | 2  | 3  | 0,06% | 27,30% |
| Seryl-tRNA synthetase (EC 6.1.1.11) (Ser  | sp P0A8L1 SYS_ECOLI  | 48.414,80  | 100,00% | 6  | 6  | 8  | 0,15% | 16,50% |
| Glucose-1-phosphatase precursor (EC 3.1.  | sp P19926 AGP_ECOLI  | 45.682,90  | 100,00% | 6  | 6  | 7  | 0,13% | 17,40% |
| Glutamate-1-semialdehyde 2,1-aminomutase  | sp P23893 GSA_ECOLI  | 45.366,30  | 100,00% | 3  | 3  | 3  | 0,06% | 9,86%  |
| 30S ribosomal protein S6 [Contains: 30S   | sp P02358 RS6_ECOLI  | 15.703,30  | 96,30%  | 1  | 1  | 1  | 0,02% | 8,15%  |
| Bifunctional protein hldE [Includes: D-b  | sp P76658 HLDE_ECOLI | 51.050,60  | 99,50%  | 1  | 1  | 1  | 0,02% | 2,52%  |
| Polyribonucleotide nucleotidyltransferas  | sp P05055 PNP_ECOLI  | 77.101,00  | 100,00% | 20 | 26 | 34 | 0,62% | 36,40% |
| Tyrosyl-tRNA synthetase (EC 6.1.1.1) (Ty  | sp P0AGJ9 SYT_ECOLI  | 47.397,00  | 100,00% | 2  | 2  | 2  | 0,04% | 6,15%  |
| D-galactose-binding periplasmic protein   | sp P0AEE5 DGAL_ECOLI | 35.713,30  | 100,00% | 9  | 11 | 16 | 0,29% | 34,90% |
| Isocitrate lyase (EC 4.1.3.1) (Isocitras  | sp P0A9G6 ACEA_ECOLI | 47.522,00  | 100,00% | 13 | 16 | 19 | 0,35% | 47,70% |
| Chaperone surA precursor (Peptidyl-proly  | sp P0ABZ6 SURA_ECOLI | 47.284,70  | 100,00% | 4  | 4  | 5  | 0,09% | 12,10% |
| Protein ydgA precursor.                   | sp P77804 YDGA_ECOLI | 54.690,10  | 100,00% | 7  | 7  | 7  | 0,13% | 18,30% |
| Hypothetical lipoprotein ygdI precursor.  | sp P65292 YGDI_ECOLI | 8.174,30   | 96,30%  | 1  | 2  | 2  | 0,04% | 26,70% |
| Periplasmic oligopeptide-binding protein  | sp P23843 OPPA_ECOLI | 60.899,80  | 100,00% | 23 | 34 | 61 | 1,12% | 47,10% |
| Citrate synthase (EC 2.3.3.1).            | sp P0ABH7 CISY_ECOLI | 48.016,80  | 100,00% | 24 | 33 | 74 | 1,36% | 61,80% |
| 3-hydroxydecanoyl-[acyl-carrier-protein]  | sp P0A6Q3 FABA_ECOLI | 18.838,40  | 99,70%  | 2  | 2  | 3  | 0,06% | 11,70% |
| 4-aminobutyrate aminotransferase (EC 2.6  | sp P22256 GABT_ECOLI | 45.775,60  | 100,00% | 5  | 5  | 6  | 0,11% | 15,50% |
| Methionyl-tRNA synthetase (EC 6.1.1.10)   | sp P00959 SYM_ECOLI  | 76.125,50  | 100,00% | 4  | 4  | 4  | 0,07% | 7,84%  |
| Outer membrane protein assembly factor y  | sp P0A940 YAET_ECOLI | 90.554,40  | 100,00% | 18 | 21 | 25 | 0,46% | 31,50% |
| Translation initiation factor IF-2.       | sp P0A705 IF2_ECOLI  | 97.349,00  | 100,00% | 3  | 3  | 3  | 0,06% | 3,26%  |
| Putative Na(+)/H(+) exchanger yjcE.       | sp P32703 YJCE_ECOLI | 60.525,40  | 97,90%  | 1  | 1  | 1  | 0,02% | 2,55%  |
| NAD-dependent malic enzyme (EC 1.1.1.38)  | sp P26616 MAO1_ECOLI | 63.198,80  | 100,00% | 10 | 10 | 10 | 0,18% | 19,50% |
| Hypothetical ABC transporter ATP-binding  | sp P36879 YADG_ECOLI | 34.648,40  | 100,00% | 2  | 2  | 2  | 0,04% | 7,47%  |
| D-amino acid dehydrogenase                | sp P0A6J5 DADA_ECOLI | 47.607,60  | 100,00% | 4  | 4  | 4  | 0,07% | 10,40% |

|                                                  |                      |            |         |    |    |    |       |        |
|--------------------------------------------------|----------------------|------------|---------|----|----|----|-------|--------|
| small subunit                                    |                      | 0          |         |    |    |    |       |        |
| Transaldolase B (EC 2.2.1.2).                    | sp P0A870 TALB_ECOLI | 35.089,70  | 100,00% | 14 | 15 | 20 | 0,37% | 58,90% |
| Biosynthetic arginine decarboxylase (EC          | sp P21170 SPEA_ECOLI | 73.899,00  | 100,00% | 9  | 9  | 10 | 0,18% | 16,40% |
| Thiol peroxidase (EC 1.11.1.-) (Scavenga         | sp P0A862 TPX_ECOLI  | 17.704,00  | 96,30%  | 1  | 1  | 2  | 0,04% | 7,78%  |
| Major outer membrane lipoprotein precurs         | sp P69776 LPP_ECOLI  | 8.323,70   | 100,00% | 5  | 12 | 49 | 0,90% | 48,70% |
| Phosphopentomutase (EC 5.4.2.7) (Phospho         | sp P0A6K6 DEOB_ECOLI | 44.371,10  | 96,30%  | 1  | 1  | 1  | 0,02% | 2,95%  |
| Trigger factor (TF).                             | sp P0A850 TIG_ECOLI  | 48.192,90  | 100,00% | 10 | 12 | 15 | 0,28% | 26,60% |
| 50S ribosomal protein L28.                       | sp P0A7M2 RL28_ECOLI | 8.875,30   | 99,90%  | 2  | 2  | 3  | 0,06% | 13,00% |
| Putative cytochrome d ubiquinol oxidase          | sp P0ADW3 YHCB_ECOLI | 15.239,80  | 100,00% | 6  | 11 | 16 | 0,29% | 63,40% |
| Hypothetical lipoprotein yajG precursor.         | sp P0ADA5 YAJG_ECOLI | 20.950,40  | 100,00% | 4  | 4  | 9  | 0,17% | 25,00% |
| Putative aldolase yneB (EC 4.2.1.-).             | sp P76143 YNEB_ECOLI | 31.893,00  | 100,00% | 16 | 23 | 42 | 0,77% | 59,10% |
| Ribulose-phosphate 3-epimerase (EC 5.1.3         | sp P0AG07 RPE_ECOLI  | 24.554,90  | 96,30%  | 1  | 1  | 1  | 0,02% | 6,67%  |
| Nucleoside-specific channel-forming prot         | sp P0A927 TSX_ECOLI  | 33.590,20  | 100,00% | 2  | 2  | 6  | 0,11% | 8,16%  |
| Anaerobic C4-dicarboxylate transporter d         | sp P0ABN5 DCUA_ECOLI | 45.752,20  | 100,00% | 3  | 3  | 4  | 0,07% | 7,16%  |
| Phosphoglucosyltransferase (EC 5.4.2.2) (Glucose | sp P36938 PGM_ECOLI  | 58.361,60  | 100,00% | 3  | 3  | 3  | 0,06% | 6,59%  |
| Protein tolB precursor.                          | sp P0A855 TOLB_ECOLI | 45.955,10  | 100,00% | 4  | 4  | 4  | 0,07% | 11,40% |
| Bifunctional putA protein [Includes: Pro         | sp P09546 PUTA_ECOLI | 143.818,40 | 100,00% | 21 | 23 | 29 | 0,53% | 19,50% |
| Ribosome recycling factor (Ribosome-rele         | sp P0A805 RRF_ECOLI  | 20.639,30  | 100,00% | 7  | 8  | 11 | 0,20% | 40,00% |
| UTP-glucose-1-phosphate uridylyltransfe          | sp P0AEP3 GALU_ECOLI | 32.810,80  | 96,30%  | 1  | 1  | 1  | 0,02% | 4,32%  |
| Protein yicC.                                    | sp P23839 YICC_ECOLI | 33.175,20  | 100,00% | 3  | 4  | 4  | 0,07% | 13,60% |
| Ubiquinol oxidase polypeptide I (EC 1.10         | sp P0AB18 CYOB_ECOLI | 74.370,10  | 100,00% | 7  | 11 | 16 | 0,29% | 11,50% |
| NADP-dependent L-serine/L-allo-threonine         | sp P39831 YDFG_ECOLI | 27.248,70  | 96,30%  | 1  | 1  | 1  | 0,02% | 7,26%  |
| D-serine/D-alanine/glycine transporter.          | sp P0AAE0 CYCA_ECOLI | 51.660,80  | 96,30%  | 1  | 1  | 1  | 0,02% | 2,98%  |
| Tyrosine-protein kinase wzc (EC 2.7.1.11         | sp P76387 WZC_ECOLI  | 79.345,10  | 100,00% | 2  | 3  | 5  | 0,09% | 3,61%  |
| GTP-binding protein typA/BipA (Tyrosine          | sp P32132 TYPA_ECOLI | 67.356,00  | 100,00% | 2  | 2  | 2  | 0,04% | 3,46%  |
| ProP effector.                                   | sp P45577 PROQ_ECOLI | 25.892,40  | 96,30%  | 1  | 1  | 1  | 0,02% | 4,31%  |
| Galactoside transport ATP-binding protei         | sp P0AAG8 MGLA_ECOLI | 56.417,70  | 96,30%  | 1  | 1  | 1  | 0,02% | 2,57%  |
| L-fucose isomerase (EC 5.3.1.25) (6-deox         | sp P69922 FUCI_ECOLI | 64.977,20  | 100,00% | 2  | 2  | 2  | 0,04% | 3,21%  |
| UPF0092 protein yajC.                            | sp P0ADZ7 YAJC_ECOLI | 11.887,60  | 100,00% | 4  | 4  | 10 | 0,18% | 27,30% |
| Flavoprotein wrbA (Trp repressor binding         | sp P0A8G6 WRBA_ECOLI | 20.714,20  | 98,00%  | 1  | 1  | 1  | 0,02% | 8,63%  |
| Outer membrane protein A precursor (Oute         | sp P0A910 OMPA_ECOLI | 37.201,00  | 100,00% | 15 | 20 | 42 | 0,77% | 42,80% |
| Hypothetical lipoprotein yddW precursor.         | sp P64426 YDDW_ECOLI | 49.575,10  | 99,80%  | 1  | 1  | 2  | 0,04% | 2,51%  |
| 30S ribosomal protein S18.                       | sp P0A7T7 RS18_ECOLI | 8.855,80   | 100,00% | 2  | 2  | 3  | 0,06% | 24,30% |
| Inner membrane protein ybaL.                     | sp P39830 YBAL_ECOLI | 59.425,90  | 96,30%  | 1  | 1  | 1  | 0,02% | 3,05%  |
| Outer membrane protein F precursor (Pori         | sp P02931 OMPF_ECOLI | 39.334,40  | 100,00% | 7  | 8  | 11 | 0,20% | 20,70% |

|                                           |                       |            |         |    |    |    |       |        |
|-------------------------------------------|-----------------------|------------|---------|----|----|----|-------|--------|
| Malate dehydrogenase (EC 1.1.1.37).       | sp P61889 MDH_ECOLI   | 32.337,30  | 100,00% | 11 | 15 | 28 | 0,51% | 38,10% |
| Trehalose-6-phosphate hydrolase (EC 3.2). | sp P28904 TREC_ECOLI  | 63.838,50  | 100,00% | 2  | 2  | 2  | 0,04% | 3,81%  |
| 50S ribosomal protein L3.                 | sp P60438 RL3_ECOLI   | 22.242,80  | 95,60%  | 1  | 1  | 1  | 0,02% | 4,78%  |
| Aspartate-semialdehyde dehydrogenase (EC  | sp P0A9Q9 DHAS_ECOLI  | 40.018,60  | 100,00% | 2  | 2  | 3  | 0,06% | 8,99%  |
| Periplasmic beta-glucosidase precursor (  | sp P33363 BGLX_ECOLI  | 83.461,40  | 100,00% | 3  | 3  | 3  | 0,06% | 4,71%  |
| Inorganic pyrophosphatase (EC 3.6.1.1) (  | sp P0A7A9 IPYR_ECOLI  | 19.572,80  | 100,00% | 3  | 3  | 3  | 0,06% | 16,00% |
| Glycyl-tRNA synthetase beta chain (EC 6.  | sp P00961 SYGB_ECOLI  | 76.684,10  | 100,00% | 23 | 30 | 44 | 0,81% | 39,70% |
| Starvation-sensing protein rspA.          | sp P38104 RSPA_ECOLI  | 45.969,40  | 99,00%  | 2  | 2  | 2  | 0,04% | 9,16%  |
| 30S ribosomal protein S5.                 | sp P0A7W1 RS5_ECOLI   | 17.471,80  | 100,00% | 5  | 6  | 6  | 0,11% | 48,20% |
| Hypothetical protein yhil precursor.      | sp P37626 YHII_ECOLI  | 38.828,50  | 100,00% | 2  | 2  | 2  | 0,04% | 7,89%  |
| Sensor protein kdpD (EC 2.7.3.-).         | sp P21865 KDPD_ECOLI  | 98.719,90  | 98,60%  | 2  | 2  | 2  | 0,04% | 3,24%  |
| Ribonucleoside-diphosphate reductase 1 a  | sp P00452 RIR1_ECOLI  | 85.778,80  | 100,00% | 3  | 3  | 3  | 0,06% | 5,65%  |
| Lysophospholipase L2 (EC 3.1.1.5) (Lecit  | sp P07000 PLDB_ECOLI  | 38.978,50  | 95,00%  | 1  | 1  | 1  | 0,02% | 5,59%  |
| Hypothetical UPF0142 protein ycaO.        | sp P75838 YCAO_ECOLI  | 65.653,60  | 100,00% | 2  | 2  | 2  | 0,04% | 3,92%  |
| Phosphoenolpyruvate synthase (EC 2.7.9.2  | sp P23538 PPSA_ECOLI  | 87.304,40  | 99,80%  | 2  | 2  | 2  | 0,04% | 3,41%  |
| Outer membrane protein tolC precursor.    | sp P02930 TOLC_ECOLI  | 54.015,20  | 96,30%  | 1  | 1  | 1  | 0,02% | 3,23%  |
| HTH-type transcriptional regulator maltT  | sp P06993 MALT_ECOLI  | 103.121,50 | 100,00% | 3  | 3  | 3  | 0,06% | 3,88%  |
| ABC transporter periplasmic-binding prot  | sp P39325 YTFQ_ECOLI  | 34.345,60  | 100,00% | 7  | 10 | 19 | 0,35% | 29,20% |
| Vitamin B12 transporter btuB precursor (  | sp P06129 BTUB_ECOLI  | 68.408,20  | 100,00% | 7  | 7  | 7  | 0,13% | 14,80% |
| Cytochrome d ubiquinol oxidase subunit I  | sp P0ABK2 CYDB_ECOLI  | 42.454,10  | 100,00% | 3  | 7  | 11 | 0,20% | 7,65%  |
| Septum site-determining protein minD (Ce  | sp P0AEZ3 MIND_ECOLI  | 29.484,10  | 100,00% | 3  | 3  | 3  | 0,06% | 14,90% |
| PTS system glucose-specific EIICB compon  | sp P69786 PTGCB_ECOLI | 50.678,40  | 100,00% | 8  | 11 | 20 | 0,37% | 20,80% |
| D-lactate dehydrogenase (EC 1.1.1.28) (D  | sp P52643 LDHD_ECOLI  | 36.535,70  | 100,00% | 2  | 2  | 2  | 0,04% | 7,60%  |
| NADH-quinone oxidoreductase chain C/D (E  | sp P33599 NUOCD_ECOLI | 68.696,40  | 100,00% | 14 | 16 | 20 | 0,37% | 26,80% |
| Cytochrome d ubiquinol oxidase subunit I  | sp P0ABJ9 CYDA_ECOLI  | 58.207,40  | 100,00% | 19 | 26 | 57 | 1,05% | 30,10% |
| Inner membrane protein yjgP.              | sp P0AF98 YJGP_ECOLI  | 40.358,90  | 100,00% | 3  | 3  | 3  | 0,06% | 10,40% |
| Carbon starvation protein A.              | sp P15078 CSTA_ECOLI  | 75.107,10  | 100,00% | 6  | 8  | 11 | 0,20% | 8,27%  |
| Pyruvate kinase II (EC 2.7.1.40) (PK-2).  | sp P21599 KPYK2_ECOLI | 51.226,60  | 100,00% | 13 | 15 | 22 | 0,40% | 30,90% |
| Peptidase B (EC 3.4.11.23) (Aminopeptida  | sp P37095 PEPB_ECOLI  | 46.181,80  | 100,00% | 8  | 9  | 11 | 0,20% | 23,20% |

92

93

94 **Supplemental text.**

95 To further investigate the role of tags fused to cell division proteins we compared the effects  
96 of mild overexpression of GFP-fusions to FtsQ and FtsQ D237N to that of untagged FtsQ and  
97 FtsQ D237N. FtsQ, GFP-FtsQ, FtsQ D237N and GFP-FtsQ D237N were expressed at  
98 endogenous levels in *E. coli* MC4100 in addition to the chromosomal *ftsQ* and subsequently  
99 dilutions of these cultures were spotted on a plate and incubated to form colonies. GFP-FtsQ  
100 and GFP-FtsQ D237N are both expressed at endogenous levels from a leaky *Trc99<sub>down</sub>*  
101 promotor, FtsQ and FtsQ D237N are both expressed at endogenous levels from a pBAD  
102 promotor after induction with 0.2% arabinose (Fig. S5B). A clear difference was observed  
103 between strains expressing FtsQ D237N and GFP-FtsQ D237N. As previously shown, mild  
104 overexpression of FtsQ D237N disrupts the 1 MDa cell division complex. Here, mild  
105 expression of FtsQ D237N and of GFP-FtsQ D237N results in less growth on the plate as  
106 compared to empty vector. GFP-FtsQ D237N is always expressed and thus this strain is  
107 inhibited in growth by one order of magnitude as compared to empty vector. FtsQ-D237N is  
108 expressed after induction with 0.2% arabinose. When not induced, this strain grows similar to  
109 empty vector; when FtsQ D237N is induced, growth is inhibited by two orders of magnitude  
110 as compared to empty vector and by one order of magnitude as compared to GFP-FtsQ  
111 D237N (Fig. S5A). Thus, addition of a GFP-tag to the mutant FtsQ D237N makes it less  
112 inhibitory on growth. Also, a difference in growth can be observed between strains expressing  
113 additional FtsQ and GFP-FtsQ. Here, mild expression of GFP-FtsQ results in less growth.  
114 GFP-FtsQ is always expressed and thus this strain is inhibited in growth by one order of  
115 magnitude as compared to empty vector. FtsQ is expressed after induction with 0.2%  
116 arabinose. Whether induced or not, this strain grows similar as compared to empty vector  
117 (Fig. 5A). Thus, addition of a GFP-tag to the mutant FtsQ D237N makes the mutant less  
118 growth-inhibiting, whereas addition of a GFP-tag to wild type FtsQ makes it more growth-



119 inhibiting. This observation is in agreement with the finding that GFP-FtsQ protein  
120 complexes at a different size than 1 MDa (Fig. 5).

121

## 122 **Supplementary reference**

123 1. Wagner, S. *et al.* Consequences of membrane protein overexpression in *Escherichia coli*.  
124 *Mol. Cell. Proteomics* **6**, 1527-1550 (2007).

125

126

127 **Supplementary file S1** Raw data of the Mass Spectrometry experiment. The data can be  
128 viewed with the freely available demo version of the Scaffold proteome software package  
129 (<http://www.proteomesoftware.com/products/scaffold/>)

130
